1 **RsrR: a novel redox sensitive Rrf2 family transcription factor in *Streptomyces***  
2 ***venezuelae***

3

4 John T. Munnoch<sup>1</sup>, M<sup>a</sup> Teresa Pellicer Martinez<sup>2</sup>, Dimitri A. Svistunenko<sup>3</sup>, Jason C. Crack<sup>2</sup>,  
5 Nick E. Le Brun<sup>2#</sup> and Matthew I. Hutchings<sup>1#</sup>

6

7 <sup>1</sup>School of Biological Sciences, University of East Anglia, Norwich, Norwich Research Park,  
8 NR4 7TJ

9 <sup>2</sup>Centre for Molecular and Structural Biochemistry, School of Chemistry, University of East  
10 Anglia, Norwich, Norwich Research Park, NR4 7TJ

11 <sup>3</sup>School of Biological Sciences, University of Essex, Wivenhoe Park, Colchester CO4 3SQ

12

13 Running Head: RsrR is a novel redox sensor in *S. venezuelae*.

14

15 #Address correspondence to: [n.le-brun@uea.ac.uk](mailto:n.le-brun@uea.ac.uk); [m.hutchings@uea.ac.uk](mailto:m.hutchings@uea.ac.uk)

16

17 **Abstract length: 225 words.**

18 **Text length: 6870 words.**

19

20 **Abstract.** Members of the Rrf2 superfamily of transcription factors are widespread in  
21 bacteria but their biological functions are largely unknown. The few that have been  
22 characterised in detail sense nitric oxide (NsrR), iron limitation (RirA), cysteine availability  
23 (CymR) and the iron sulphur (Fe-S) cluster status of the cell (IscR). Here we combine ChIP-  
24 seq, ChIP-exo and dRNA-seq with *in vitro* biochemistry to characterise a new member of the  
25 Rrf2 family in the model organism *Streptomyces venezuelae*. We show that Sven6563 has a  
26 redox active [2Fe-2S] cluster and that the switch from oxidized to reduced cluster switches  
27 off DNA binding activity. We have named the protein RsrR for Redox sensitive response  
28 Regulator. Binding site positions at target promoters combined with expression data suggest  
29 RsrR acts primarily as a repressor, like other Rrf2 proteins. ChIP shows that RsrR can bind to  
30 class 1 target promoters containing an 11-3-11bp inverted repeat motif and class 2 target  
31 promoters containing a single 11 bp motif. All 630 ChIP-exo peaks contain at least one motif,  
32 suggesting a global role for RsrR. However, the strongest targets are class 1 and include  
33 NAD(P)<sup>+</sup> dependent enzymes, NAD(P)<sup>+</sup> biosynthetic enzymes, the NADH and NADPH  
34 dehydrogenases and a putative NAD(P)<sup>+</sup> binding regulator that is divergently transcribed  
35 from *rsrR*. Thus, our data suggest RsrR senses redox changes in the cell and has a primary  
36 role in regulating NAD(P)H metabolism.

37

38 **Importance.** Redox stress, Fe-S proteins, Rrf2 regulators and actinomycetes.

39

40 **Introduction.** Filamentous *Streptomyces* bacteria produce bioactive secondary metabolites  
41 that account for more than half of all known antibiotics as well as anticancer, anti-helminthic  
42 and immunosuppressant drugs (1, 2). More than 600 *Streptomyces* species are known and  
43 each encodes between 10 and 50 secondary metabolites but only 25% of these compounds  
44 are produced *in vitro* so there is huge potential for the discovery of new natural products from  
45 *Streptomyces* and their close relatives. This is revitalizing research into these bacteria and  
46 *Streptomyces venezuelae* has recently emerged as a new model for studying their complex  
47 life cycle, in part because of its unusual ability to sporulate to near completion when grown  
48 in submerged liquid culture. This means the different tissue types involved in the progression  
49 to sporulation can be easily separated and used for tissue specific analyses such as RNA and  
50 ChIP-seq (3, 4). *Streptomyces* species are complex bacteria that grow like fungi, forming a  
51 branching, feeding substrate mycelium in the soil that differentiates upon nutrient stress into  
52 reproductive aerial hyphae that undergo cell division to form spores (5). Differentiation is  
53 closely linked to the production of antibiotics which are presumed to offer a competitive  
54 advantage when nutrients become scarce in the soil.

55 *Streptomyces* bacteria are well adapted for life in the complex soil environment with more  
56 than a quarter of their ~9 Mbp genomes encoding one and two-component signaling  
57 pathways that allow them to rapidly sense and respond to changes in their environment (6).  
58 They are facultative aerobes and have multiple systems for dealing with redox, oxidative and  
59 nitrosative stress. Most species can survive for long periods in the absence of O<sub>2</sub>, most likely  
60 by respiring nitrate, but the molecular details are not known (7). They deal effectively with  
61 nitric oxide (NO) generated either endogenously through nitrate respiration (7) or in some  
62 cases from dedicated bacterial NO synthase (bNOS) enzymes (8) or by other NO generating  
63 organisms in the soil (9). We recently characterised NsrR, which is the major bacterial NO  
64 stress sensor in *Streptomyces coelicolor* (ScNsrR). NsrR is a dimeric Rrf2 family protein with

65 one [4Fe-4S] cluster per monomer that reacts rapidly with up to eight molecules of NO (10,  
66 11). Nitrosylation of the Fe-S cluster results in derepression of the *nsrR*, *hmpA1* and *hmpA2*  
67 genes (11), which results in transient expression of HmpA NO dioxygenase enzymes that  
68 convert NO to nitrate (12–14). The Rrf2 superfamily of bacterial transcription factors is still  
69 relatively poorly characterised, but many have C-terminal cysteine residues that are known or  
70 predicted to coordinate Fe-S clusters. Other characterised Rrf2 proteins include RirA which  
71 senses iron limitation most likely through an Fe-S cluster (15) and IscR which senses the Fe-  
72 S cluster status of the cell (16).

73 In this work we report the characterisation of the *S. venezuelae* protein Sven6563 and show  
74 that it is a novel member of the Rrf2 superfamily. We have named this protein RsrR for  
75 Redox sensitive response Regulator. Although it is annotated as an NsrR homologue it shares  
76 only 27% identity with ScNsrR and is not genetically linked to an *hmpA* gene (Fig. S1 and  
77 S2). We purified the RsrR protein under anaerobic conditions and found that it is a dimer with  
78 each monomer containing a reduced [2Fe-2S] cluster that is rapidly oxidized but not  
79 destroyed by oxygen. In fact we show the cluster can switch easily between oxidized and  
80 reduced states and provide evidence that this switch controls its DNA binding activity.  
81 Chromatin immunoprecipitation followed by sequencing (ChIP-seq) analysis of RsrR in *S.*  
82 *venezuelae* combined with dRNA-seq and EMSA studies allowed us to define the RsrR  
83 regulon and binding sites and determine that it acts primarily as a transcriptional repressor.  
84 Little fluctuation in the expression pattern of target genes is observed between wild-type and  
85  $\Delta$ *rsrR* strains which we hypothesize is due to additional levels of regulation, primarily by a  
86 divergent regulator, NmrA, whose expression is controlled by RsrR. Class 1 RsrR targets  
87 contain at least one 11-3-11bp inverted repeat while class 2 targets contain only half sites,  
88 with a single 11bp motif. Class 1 targets are most strongly enriched *in vivo* but there is little  
89 difference in binding affinity *in vitro* suggesting additional nucleotides may enhance binding

90 to class 2 sites that are not identified using MEME. This is supported by the fact that RsrR  
91 binds weakly to artificial half sites *in vitro*. Class 1 target genes include NAD(P) dependent  
92 oxidoreductases and the NADH and NADPH dehydrogenase operons consistent with a  
93 primary role for RsrR in regulating NAD(P)H metabolism in response to redox changes in  
94 the cell.

95

## 96 **Results**

97 **RsrR regulates genes involved in NAD(P)H metabolism.** To investigate RsrR function in *S.*  
98 *venezuelae* we decided to first identify target genes for RsrR in *S. venezuelae*. We  
99 constructed an *S. venezuelae*  $\Delta$ *rsrR* mutant that expresses an N-terminally 3xFlag-tagged  
100 RsrR protein and performed ChIP-seq against this strain and wild-type *S. venezuelae* (ChIP-  
101 Seq accession number - TBC). The sequencing reads from the wild-type (control) sample  
102 were subtracted from the experimental sample before ChIP peaks were called (Fig. 1A). With  
103 no defined cut-off or arbitrary cut-offs of  $\geq 200$  reads or  $\geq 500$  sequencing reads per peak we  
104 identified  $>2700$ ,  $>600$  and 119 enriched target sequences, respectively (Supplementary File  
105 S1). A subset of the 119 targets can be found in Table 1. Working with the shortlist of 119  
106 targets we confirmed the peaks by visual inspection of the data using Integrated Genome  
107 Browser (17). Fourteen of the ChIP peaks are in intergenic regions between divergent genes  
108 giving a total of 133 possible targets (Table S3). The core MEME suite tool, MEME (18) was  
109 used to search for a consensus RsrR binding site in all 119 sequences and identified a single  
110 conserved motif present in all 126 sequences (Fig. 1B and Supplementary File S4). In 14 of  
111 these 119 peaks a motif is present corresponding to an inverted 11-3-11bp repeat, which is  
112 characteristic of full-length Rrf2 binding sites and we called these class 1 targets (Fig. 1C,  
113 Table 1 and Supplementary File S5). Previous studies of *E. coli* NsrR have suggested that  
114 target genes with full 11bp inverted repeat binding sites are most strongly repressed and

115 therefore most physiologically relevant, thus perhaps giving clues about the primary function  
116 of RsrR. Two of the class 1 sites are between divergent genes (*sven3827/8* and *sven6562/3* –  
117 the *rsrR* peak). The 107 bp intergenic region between *sven6562* and *rsrR*, contains two  
118 putative class 1 RsrR binding sites separated by a single base pair. *sven6562* encodes a LysR  
119 family regulator with an NmrA-type ligand binding domain predicted to sense redox poise by  
120 binding NAD(P)<sup>+</sup> but not NAD(P)H (19). From hereon we refer to *sven6562* as *nmrA*. The  
121 positions of the two RsrR binding sites relative to the transcript start sites (TSS) of *sven6562*  
122 and *rsrR* suggests that RsrR represses transcription of both genes by blocking the RNA  
123 polymerase binding site. Other class 1 targets include the *nuo* (NADH dehydrogenase)  
124 operon *sven4265-78* (*nuoA-N*) which contains an internal class 1 RsrR site (upstream of  
125 *sven4272*, *nuoH*), the putative NADP<sup>+</sup> dependent dehydrogenase Sven1847 and the quinone  
126 oxidoreductase Sven5174 which converts quinone and NAD(P)H to hydroquinone and  
127 NAD(P)<sup>+</sup> (Table 1). Based on this data we suggest RsrR plays a primary role in regulating  
128 NAD(P)H metabolism and possibly senses redox poise in the cell. Intriguingly, however,  
129 dRNA-seq (expression data for the regulon is available in File S1.5 and TSS data in S3.6-9)  
130 (dRNA-seq accession number - TBC) suggests only a single class 1 targets is induced in an  
131 *rsrR* mutant and that is the divergent gene *nmrA*. This is probably because the other genes are  
132 subject to more complex regulation from multiple transcription factors. The remaining 105  
133 genes on the RsrR shortlist were classified as class 2 targets because they have single copies  
134 of the class 2 motif, which we call half sites (Fig. 1B). Half sites have been observed for  
135 other Rrf2 proteins including *E. coli* NsrR and these half-site promoters are subject to much  
136 weaker repression and their physiological relevance is unclear (20–22).

137

138 **Purified RsrR contains a redox active [2Fe-2S] cluster.** RsrR contains three C-terminal  
139 cysteine residues which is characteristic of Rrf2 proteins that ligate Fe-S clusters. To

140 investigate the cofactor and DNA binding activity of RsrR we over-expressed the *rsrR* gene  
141 in *E. coli* and purified the protein under strictly anaerobic conditions. Upon purification, the  
142 fractions containing RsrR were pink in colour but rapidly turned brown when exposed to O<sub>2</sub>,  
143 suggesting the presence of a redox-active cofactor. The UV-visible absorbance spectrum of  
144 the as isolated protein, Fig. 2A, revealed broad weak bands in the 300- 640 nm region.  
145 Following exposure to O<sub>2</sub>, the spectrum changed significantly, with a more intense  
146 absorbance band at 460 nm and a pronounced shoulder feature at 330 nm (Fig. 2A). The form  
147 of the reduced and oxidized spectra are similar to those previously reported for [2Fe-2S]  
148 clusters that are coordinated by three Cys residues and one His (23, 24). The anaerobic  
149 addition of dithionite to the previously air-exposed sample (at a 1:1 ratio with [2Fe-2S]  
150 cluster as determined by iron content) resulted in a spectrum very similar to that of the as  
151 isolated protein (Fig. 2A), demonstrating that the cofactor undergoes redox cycling.

152 Because the electronic transitions of iron-sulfur clusters become optically active as a  
153 result of the fold of the protein in which they are bound, CD spectra reflect the cluster  
154 environment (25). The near UV-visible CD spectrum of RsrR (Fig. 2B) for the as isolated  
155 protein contained three positive (+) features at 303, 385 and 473 nm and negative features at  
156 (-) 343 and 559 nm. When the protein was exposed to ambient O<sub>2</sub> for 30 min, significant  
157 changes in the CD spectrum were observed, with features at (+) 290, 365, 500, 600 nm and (-  
158 ) 320, 450 and 534 nm (Fig. 2B). The CD spectra are similar to those reported for Rieske-  
159 type [2Fe-2S] clusters (23, 26, 27), which are coordinated by two Cys and two His residues.  
160 Anaerobic addition of dithionite (1 equivalent of [2Fe-2S] cluster) resulted in reduction back  
161 to the original form (Fig. 2B) consistent with the stability of the cofactor to redox cycling.

162 The absorbance data above indicates that the cofactor is in the reduced state as  
163 isolated. [2Fe-2S] clusters in their reduced state are paramagnetic ( $S = \frac{1}{2}$ ) and therefore  
164 should give rise to an EPR signal. The EPR spectrum for the as isolated protein contained

165 signals at  $g = 1.997$ ,  $1.919$  and  $1.867$  (Fig. 2C). These  $g$ -values and the shape of the spectrum  
166 are characteristic of a  $[2\text{Fe-2S}]^{1+}$  cluster. The addition of excess sodium dithionite to the as  
167 isolated protein did not cause any changes in the EPR spectrum (Fig. 2C) indicating that the  
168 cluster was fully reduced as isolated. Exposure of the as isolated protein to ambient  $\text{O}_2$   
169 resulted in an EPR-silent form, with only a small free radical signal typical for background  
170 spectra, consistent with the oxidation of the cluster to the  $[2\text{Fe-2S}]^{2+}$  form (Fig. 2C), and the  
171 same result was obtained upon addition of the oxidant potassium ferricyanide (data not  
172 shown).

173 To further establish the cofactor that RsrR binds, native ESI-MS was employed. Here,  
174 a C-terminal His-tagged form of the protein was ionized in a volatile aqueous buffered  
175 solution that enabled it to remain folded with its cofactor bound. The deconvoluted mass  
176 spectrum contained several peaks in regions that corresponded to monomer and dimeric  
177 forms of the protein, (Fig. S6). In the monomer region (Fig. 3A), a peak was observed at  
178  $17,363$  Da, which corresponds to the apo-protein (predicted mass  $17363.99$  Da), along with  
179 adduct peaks at  $+23$  and  $+64$  Da due to  $\text{Na}^+$  (commonly observed in native mass spectra) and  
180 most likely two additional sulfurs (Cys residues readily pick up additional sulfurs as  
181 persulfides (28), respectively). A peak was also observed at  $+176$  Da, corresponding to the  
182 protein containing a  $[2\text{Fe-2S}]$  cluster. As for the apo-protein, peaks corresponding to  $\text{Na}^+$  and  
183 sulfur adducts of the cluster species were also observed (Fig. 3A). A significant peak was  
184 also detected at  $+120$  Da which corresponds to a break down product of the  $[2\text{Fe-2S}]$  cluster  
185 (from which one iron is missing,  $\text{FeS}_2$ ). In the dimer region, the signal to noise is  
186 significantly reduced but peaks are still clearly present (Fig. 3B). The peak at  $34,726$  Da  
187 corresponds to the RsrR homodimer (predicted mass  $34727.98$  Da), and the peak at  $+352$  Da  
188 corresponds to the dimer with two  $[2\text{Fe-2S}]$  clusters. A peak at  $+176$  Da is due to the dimer  
189 containing one  $[2\text{Fe-2S}]$  cluster. A range of cluster breakdown products similar to those



190 detected in the monomer region were also observed (Fig. 3B). Taken together, the data  
191 reported here demonstrate that RsrR contains a [2Fe-2S] cluster that can be reversibly cycled  
192 between oxidised (+2) and reduced (+1) states.

193

#### 194 **Cluster- and oxidation state dependent binding of RsrR to RsrR-regulated promoter**

195 **DNA.** To determine which form of RsrR is able to specifically bind DNA, EMSA  
196 experiments using a highly enriched ChIP target *sven1847/8*. Increasing ratios of [2Fe-2S]  
197 RsrR to DNA resulted in a clear shift in the mobility of the promoter DNA from unbound to  
198 bound, see Fig. 4A. Equivalent experiments with cluster-free (apo) RsrR did not result in a  
199 mobility shift, demonstrating that the cluster is required for the observed DNA-binding  
200 activity. These experiments were performed aerobically and so the [2Fe-2S] cofactor would  
201 have been in its oxidised state. To determine if oxidation state affects DNA binding activity,  
202 EMSA experiments were performed with [2Fe-2S]<sup>2+</sup> and [2Fe-2S]<sup>1+</sup> forms of RsrR. The  
203 oxidised cluster was generated by exposure to air and confirmed by UV-visible absorbance.  
204 The reduced cluster was obtained by reduction with sodium dithionite (confirmed by UV-  
205 visible absorbance) and the reduced state was maintained using EMSA running buffer  
206 containing an excess of dithionite. The resulting EMSAs, Fig. 4B and C, show that, in both  
207 cases, DNA-binding occurred but the oxidised form bound significantly more tightly. Tight  
208 binding could be restored to the reduced RsrR samples by allowing it to re-oxidise in air (data  
209 not shown). We cannot rule out that the apparent low affinity DNA binding observed for the  
210 reduced sample results from partial re-oxidation of the cluster during the electrophoretic  
211 experiment. Nevertheless, the conclusion is unaffected: oxidised, [2Fe-2S]<sup>2+</sup> RsrR is the  
212 high affinity DNA-binding form.

213

214 **Oxidised [2Fe-2S] RsrR binds strongly to class 1 and 2 promoters *in vitro*.** To further  
215 investigate the DNA binding activities of [2Fe-2S]<sup>2+</sup> RsrR EMSAs were performed on two  
216 class 2 promoters *sven0247* and *sven519* (Fig. 5A). Both class 2 promoters we tested were  
217 shifted by oxidized [2Fe-2S] RsrR thus showing that RsrR binds strongly to both full and half  
218 site (class 1 and 2) promoters. To further test the idea of full and half site binding, we  
219 constructed a series of mutated *nmrA-rsrR* promoter fragments carrying both natural class 1  
220 sites (Fig. 5B), or artificial half sites (Fig. 5C). The results show that RsrR binds strongly to  
221 both full class 1 binding sites at the *nmrA-rsrR* promoters (Fig. 5B) but RsrR binds only  
222 weakly to artificial half sites (Fig. 5C). This suggests that although MEME only calls half  
223 sites in most of the RsrR target genes identified by ChIP-seq they must contain sufficient  
224 sequence information in the other half to enable strong binding.

225

226 **Mapping RsrR binding sites using ChIP-exo and dRNA-seq.** MEME analysis of the  
227 ChIP-seq data detected only 14 full sites out of the >600 target sites bound by RsrR in *S.*  
228 *venezuelae*. However, ChIP-Seq and EMSAs show that RsrR binds tightly to target  
229 promoters whether they contain predicted class 1 or class 2 sites. To gain more information  
230 about RsrR recognition sequences and the positions of these binding sites at target promoters  
231 we combined dRNA-seq, which maps the start sites of all expressed transcripts, with ChIP-  
232 exo, which uses Lambda exonuclease to trim excess DNA away from ChIP complexes  
233 leaving only the DNA which is actually bound and protected by RsrR (ChIP-exo accession  
234 number -TBC). For dRNA-seq, total RNA was prepared from cultures of wild type *S.*  
235 *venezuelae* grown for 16 hours and for the  $\Delta$ *rsrR* mutant. ChIP-exo was performed on the  
236  $\Delta$ *rsrR* strain producing Flag-tagged RsrR at a single 16 hour time point. The targets identified  
237 using ChIP-exo matched the previously identified ChIP-seq targets, with 630 target genes.  
238 However, the ChIP-exo peaks are on average only ~50bp wide. MEME analysis using all 630

239 ChIP-exo sequences identified the same class 2 binding motif in every sequence. We  
240 identified transcript start sites (TSS) for 261 of the 630 RsrR target genes using dRNA-seq  
241 data from the 16h time point (File S3.10). Fig. 6 shows a graphical representation of the  
242 class 1 targets that have clearly defined TSS, indicating the centre of the ChIP peak, the  
243 associated TSS and any genes within the ~200 bp frame. Based on the RsrR binding site  
244 position, transcription repression is most likely either by obstruction of RNA polymerase  
245 binding or blockage of transcription elongation where they are inside the coding sequence.  
246 This is consistent with a primary role for RsrR as a transcriptional repressor.

247

248 **Discussion.** In this work we have characterised a new member of the Rrf2 protein family,  
249 which is mis-annotated as an NsrR homologue in the *S. venezuelae* genome. The purified  
250 protein contains a [2Fe-2S] cluster, which is stable in the presence of O<sub>2</sub> and can be  
251 reversibly cycled between reduced (+1) and oxidized (+2) states. The [2Fe-2S]<sup>2+</sup> form binds  
252 strongly to both class 1 and class 2 bonding sequences *in vitro*, whereas the [2Fe-2S]<sup>1+</sup> form  
253 exhibited, at best, significantly weaker binding and the apo form does not bind to DNA at all.  
254 Given these observations and the stability of the Fe-S cluster to aerobic conditions, we  
255 propose that the activity of RsrR is modulated by the oxidation state of its cluster, becoming  
256 activated for DNA binding through oxidation and inactivated through reduction. Exposure to  
257 O<sub>2</sub> is sufficient to cause oxidation, but other oxidants may also be important *in vivo*. The  
258 properties of RsrR described here are reminiscent of an *E. coli* [2Fe-2S] cluster containing  
259 transcription factor called SoxR, which controls the regulation of another regulator, SoxS,  
260 through the oxidation state of its cluster (29). However, SoxR is a transcriptional activator  
261 that switches on *soxS* transcription upon oxidation of the cluster to its [2Fe-2S]<sup>2+</sup> state (29).

262 ChIP-seq and ChIP-exo analysis show that RsrR binds to a large regulon of ~630  
263 genes in *S. venezuelae* and approximately 2% of these contain obvious class 1 binding sites,

264 with an 11-3-11 bp inverted repeat. The fact that class 1 target genes are involved in either  
265 signal transduction and / or NAD(P)H metabolism also points to a link with redox poise and  
266 recycling of NAD(P)H to NAD(P). The >600 class 2 target genes likely bind to a full site  
267 sequence based on our EMSA results however 1 half of the site is less conserved resulting in  
268 MEME artificially reporting half site sequences. In addition to the genes involved directly in  
269 NADH/NAD(P)H metabolism, class 2 targets include 22 transcriptional regulators, genes  
270 involved in both primary and secondary metabolism, RNA/DNA replication and modification  
271 genes, transporters (mostly small molecule), proteases and a large number of genes with no  
272 known function. One of the most strongly induced target promoters in the  $\Delta rsrR$  mutant is  
273 the divergent *nmrA* gene that encodes a LysR family regulator with an N terminal NAD(P)+  
274 binding domain. NmrA proteins are thought to control redox poise in fungi by sensing the  
275 levels of NAD(P), which they can bind, and NAD(P)H, which they cannot (30). This is  
276 intriguing since RsrR presumably senses redox stress through reduction of its [2Fe-2S]  
277 cluster and this induces expression of NmrA which could sense redox poise via the ratio of  
278 NAD(P)/NAD(P)H and modulate expression of its own (unknown) target genes. It will be  
279 interesting to identify the overlap in target genes between the RsrR and NmrA gene regulons.  
280 The  $\Delta rsrR$  mutant has no obvious phenotype and is no more sensitive to redox active  
281 compounds or oxidative stress than the wild-type (not shown). This is not surprising given the  
282 number of systems in *Streptomyces* bacteria that can deal with reactive oxygen species and  
283 redox stress including detoxifying enzymes: Catalases, peroxidases (31) and superoxide  
284 dismutases (32) and associated regulators such as OxyR (33), SigR (34), OhrR (35), Rex (19)  
285 and SoxR (36).

286 NmrA proteins are similar in function to the Rex protein in Gram-positive bacteria for  
287 which NAD<sup>+</sup> and NADH compete for binding. NAD<sup>+</sup> enhances the DNA binding activity of  
288 Rex and NADH switches it off (37). Intriguingly, Rex is well conserved in Gram-positive

289 bacteria but is missing from most actinomycetes, with the exception of *Streptomyces* species  
290 where it was first characterised (19). The reverse is true of NmrA and RsrR, which are both  
291 conserved (as back to back genes) in most filamentous actinomycetes but are missing from  
292 other Gram-positive bacteria, including most *Streptomyces* species. The majority of the RsrR  
293 regulon genes identified here must be subject to more complex regulation because they are  
294 not induced in the  $\Delta rsrR$  background. For example, the *nuo* (NADH dehydrogenase) operon  
295 *sven\_4265-78* (*nuoA-N*) contains an internal class 1 RsrR site (upstream of *sven\_4272*, *nuoH*)  
296 but is not expressed in the  $\Delta rsrR$  strain. Nuo is also known to be repressed by Rex in *S.*  
297 *coelicolor* (19) and probably other streptomycetes. It will be interesting to further investigate  
298 the potential co-regulation of RsrR and NmrA target genes and to further elucidate the global  
299 network controlled by RsrR.

300

## 301 **Materials and Methods**

302 **Bacterial strains, plasmids, oligonucleotides and growth conditions.** Bacterial strains and  
303 plasmids are listed in Table S6 and oligonucleotides are listed in Table S7. For ChIP-seq  
304 experiments, *S. venezuelae* strains were grown at 30 °C in MYM liquid sporulation medium  
305 (38) made with 50% tap water and supplemented with 200µl trace element solution (39) per  
306 100ml and adjusted to a final pH of 7.3. Disruption of *rsrR* was carried out following the  
307 PCR-targeting method (40) as described previously described (41, 42). Primers JM0109 and  
308 JM0110 were used to PCR amplify the apramycin disruption cassette from pIJ773. Cosmid  
309 SV-5-F05 was used as the template cosmid. The disruption cosmid (pJM026) was checked  
310 by PCR using primers JM0111 and JM0112. Antibiotic marked, double crossover  
311 exconjugants, were identified as previously described and confirmed once more with JM0111  
312 and JM0112.

313 The 3x Flag tag copy of *rsrR* was synthesized by genescript (sequence is available in

314 Supplementary File S6) and subcloned into pMS82 using HindIII/KpnI and confirmed by  
315 PCR using primers JM0113 and JM0114.

316

317 **ChIP (chromatin immunoprecipitation) – seq and exo.**

318 ChIP-Seq was carried out as previously described (43). A spore inoculum (~5-10 ul of  $1 \times 10^8$   
319 spores) sufficient to reach an OD600 of 0.35 after 8 hours of growth was added to 35ml of  
320 MYM tap media in 250 ml flasks containing springs. Following growth to the chosen time  
321 point, the entire content of the flask was transferred to a 50 ml falcon tube for crosslinking,  
322 which was carried out by incubation at 30°C for 30 mins with 1% final concentration of  
323 formaldehyde (v/v). Crosslinking was quenched by incubation at room temperature with  
324 glycine (final concentration of 125 mM). Mycelium was harvested by centrifugation 4000  
325 rpm at 4°C for 10 minutes and washed twice with ice cold PBS before transfer to a 2 ml  
326 centrifuge tube. Pellets were resuspended in 0.75 ml lysis buffer (10 mM Tris-HCl pH 8.0,  
327 50 mM NaCl, 10 mg/ml lysozyme, 1x protease inhibitor-Roche1186170001) and incubate at  
328 37C for 10-25 mins. Then 0.75 ml 1x IP buffer (100mM tris-HCl pH 8.0, 250 mM NaCl,  
329 0.5% Triton x-100, 0.1% SDS, 1x protease inhibitor (Roche)) was added and samples mixed  
330 by pipetting up and down. Samples were sonicated 7x at 50Hz, 10 sec/cycle with a 1 min  
331 incubation on ice after each cycle. DNA fragmentation was checked by agarose gel  
332 electrophoresis following phenol extraction of 25 µl of the crude lysate mixed with 75 µl of  
333 TE buffer with 100-200 µl of phenol/chloroform. Contaminating RNA was removed with 2  
334 µl RNase (1mg/ml) added to extracted DNA followed by an incubation for 30 min at 37°C. A  
335 smear of DNA from 200 to 1000 bp with the majority of DNA 200-400 bp should be visible.  
336 Crude lysate was centrifuged at 13,000 rpm for 15 minutes at 4°C to clear the sample of cell  
337 debris. M2 affinity beads (Sigma-Aldrich #A2220) were prepared by washing in ½IP buffer

338 following manufacturers instructions. The cleared lysate was incubated with 40  $\mu$ l of washed  
339 M2 beads and incubated for 4 h at 4C in a vertical rotor. The lysate was removed and the  
340 beads pooled into one 1.5 microfuge tube and washed in 0.5 IP buffer. The beads were  
341 transferred to a fresh microfuge tube and washed a further 3 times removing as much buffer  
342 as possible without disturbing the beads. The DNA-protein complex was eluted from the  
343 beads with 100  $\mu$ l elution buffer (50 mM Tris-HCl pH7.6, 10mM EDTA, 1% SDS) by  
344 incubating at 65°C overnight. Removing the ~100 $\mu$ l elution buffer, an extra 50  $\mu$ l of elution  
345 buffer was added and further incubated at 65°C for 5 min. To extract the DNA 150  $\mu$ l eluate,  
346 2  $\mu$ l proteinase K (10 mg/ml) was added and incubated 1.5 hrs at 55°C. To the reaction 150  
347  $\mu$ l phenol-chloroform was added. Samples were vortexed and centrifuged at full speed for 10  
348 min. The aqueous layer was extracted and purified using the Qiaquick column from Qiagen  
349 with a final elution using 50  $\mu$ l EB buffer (Qiagen). The concentration of samples were  
350 determined using Quant-iT™ PicoGreen ® dsDNA Reagent (Invitrogen) or equivalent kit or  
351 by nanodrop measurement.

352 DNA sequencing of ChIP-Seq samples was carried out by GATC. ChIP-exo following  
353 sonication of lysates was carried out by Peconic LLC (State College, PA) adding an  
354 additional exonuclease treatment to the process as previously described (44).

355

### 356 **RNA-seq**

357 Mycelium was harvested at experimentally appropriate time points and immediately  
358 transferred to 2 ml round bottom tubes, flash frozen in liquid N<sub>2</sub>, stored at -80°C or used  
359 immediately. All apparatus used was treated with RNaseZAP (Sigma) to remove RNases for  
360 a minimum of 1 hour before use. RNaseZAP treated mortar and pestles were used, the pestle  
361 being placed and cooled on a mixture of dry ice and liquid N<sub>2</sub> with liquid N<sub>2</sub> being poured  
362 into the bowl and over the mortar. Once the bowl had cooled the mycelium samples were

363 added directly to the liquid N<sub>2</sub> and thoroughly crushed using the mortar leaving a fine powder  
364 of mycelium. Grindings were transferred to a pre-cooled 50 ml Falcon tube and stored on dry  
365 ice. Directly to the tube, 2 ml of TRI reagent (Sigma) was added to the grindings and mixed.  
366 Samples are then thawed while vortexing intermittently at room temperature for 5-10 minutes  
367 until the solution cleared. To 1 ml of TRI reagent resuspension, 200 µl of chloroform was  
368 added and vortexed for 15 seconds at room temperature then centrifuged for 10 minutes at  
369 13,000 rpm. The upper, aqueous phase (clear colourless layer) was removed into a new 2 ml  
370 tube. The remainder of the isolation protocol follows the RNeasy Mini Kit (Qiagen)  
371 instructions carrying out both on and off column DNase treatments. On column treatments  
372 were carried out following the first RW1 column wash. DNaseI (Qiagen) was added (10 µl  
373 enzyme, 70 µl RDD buffer) to the column and stored at RT for 1 hour. The column was  
374 washed again with RW1 then treated as described in the manufacturer's instructions. Once  
375 eluted from the column, samples were treated using TURBO DNA-free Kit (Ambion)  
376 following manufacturer's instructions to remove residual DNA contamination.  
377 Data analysis was carried out as described in the CHIP-Seq/exo section for visualisation, as  
378 well as expression profiling using CLC genomics workbench 8 and the TSSAR webservice  
379 for dRNA transcription start site analysis (45). In addition a manual visual processing  
380 approach was carried out for each.

381

### 382 **Purification of RsrR.**

383 5 L Luria-Bertani medium (10 × 500 mL) was inoculated with freshly transformed BL21  
384 (DE3) *E. coli* containing a pGS-21a vector with the *prsrR-His* insert. 100 µg/mL ampicillin  
385 and 20 µM ammonium ferric citrate were added and the cultures were grown at 37 °C, 200  
386 rpm until OD<sub>600 nm</sub> was 0.6-0.9. To facilitate *in vivo* iron-sulfur cluster formation, the flasks  
387 were placed on ice for 18 min, then induced with 100 µM IPTG and incubated at 30 °C and



388 105 rpm. After 50 min, the cultures were supplemented with 200  $\mu$ M ammonium ferric  
389 citrate and 25  $\mu$ M L-Methionine and incubated for a further 3.5 h at 30 °C. The cells were  
390 harvested by centrifugation at 10000  $\times$  g for 15 min at 4 °C. Unless otherwise stated, all  
391 subsequent purification steps were performed under anaerobic conditions inside an anaerobic  
392 cabinet ( $O_2 < 2$  ppm). Cells pellets were resuspended in 70 mL of buffer A (50 mM TRIS,  
393 50 mM  $CaCl_2$ , 5% (v/v) glycerol, pH 8) and placed in a 100 mL beaker. 30 mg/mL of  
394 lysozyme and 30 mg/mL of PMSF were added and the cell suspension thoroughly  
395 homogenized by syringe, removed from the anaerobic cabinet, sonicated twice while on ice,  
396 and returned to the anaerobic cabinet. The cell suspension was transferred to O-ring sealed  
397 centrifuge tubes (Nalgene) and centrifuged outside of the cabinet at 40,000  $\times$  g for 45 min at  
398 1 °C.

399 The supernatant was passed through a HiTrap IMAC HP (1 x 5mL; GE Healthcare) column  
400 using an ÄKTA Prime system at 1 mL/min. The column was washed with Buffer A until  $A_{280}$   
401  $_{nm} < 0.1$ . Bound proteins were eluted using a 100 mL linear gradient from 0 to 100% Buffer B  
402 (50 mM TRIS, 100 mM  $CaCl_2$ , 200mM L- Cysteine, 5% glycerol, pH 8). A HiTrap Heparin  
403 (1 x 1mL; GE Healthcare) column was used to remove the L- Cysteine, using buffer C (50  
404 mM TRIS, 2 M NaCl, 5% glycerol, pH 8) to elute the protein. Fractions containing RsrR-His  
405 were pooled and stored in an anaerobic freezer until needed. RsrR-His protein concentrations  
406 were determined using the method of Bradford (Bio-Rad Laboratories) (46), with BSA as the  
407 standard. Cluster concentrations were determined by iron assay (47), from which an  
408 extinction coefficient,  $\epsilon$ , at 455 nm was determined as  $3450 \pm 25 M^{-1} cm^{-1}$ , consistent with  
409 values reported for [2Fe-2S] clusters with His coordination (23).

410

#### 411 **Preparation of Apo- RsrR**

412 Apo-RsrR -His was prepared from as isolated holoprotein by aerobic incubation with 1 mM  
413 EDTA overnight.

414

#### 415 **Spectroscopy and mass spectrometry**

416 UV-visible absorbance measurements were performed using a Jasco V500 spectrometer, and  
417 CD spectra were measured with a Jasco J810 spectropolarimeter. EPR measurements were  
418 performed at 10 K using a Bruker EMX EPR spectrometer (X-band) equipped with a liquid  
419 helium system (Oxford Instruments). Spin concentrations in the protein samples were  
420 estimated by double integration of EPR spectra with reference to a 1 mM Cu(II) in 10 mM  
421 EDTA standard. For native MS analysis, His-tagged RsrR was exchanged into 250 mM  
422 ammonium acetate, pH 8, using PD10 desalting columns (GE Life Sciences), diluted to ~21  
423  $\mu$ M cluster and infused directly (0.3 mL/h) into the ESI source of a Bruker micrOTOF-QIII  
424 mass spectrometer (Bruker Daltonics, Coventry, UK) operating in the positive ion mode.  
425 Full mass spectra ( $m/z$  700–3500) were recorded for 5 min. Spectra were combined,  
426 processed using the ESI Compass version 1.3 Maximum Entropy deconvolution routine in  
427 Bruker Compass Data analysis version 4.1 (Bruker Daltonik, Bremen, Germany). The mass  
428 spectrometer was calibrated with ESI-L low concentration tuning mix in the positive ion  
429 mode (Agilent Technologies, San Diego, CA).

430

#### 431 **Electrophoretic Mobility Shift Assays (EMSAs)**

432 DNA fragments carrying the the intergenic region between *sven1847* and *sven1848* of the *S.*  
433 *venezualae* chromosome were PCR amplified using *S. venezualae* genomic DNA with 5' 6-  
434 FAM modified primers (Table S4). The PCR products were extracted and purified using a  
435 QIAquick gel extraction kit (Qiagen) according to the manufacturer's instructions. Probes

436 were quantitated using a nanodrop ND2000c. The molecular weights of the double stranded  
437 FAM labelled probes were calculated using OligoCalc (48).

438 Bandshift reactions (20  $\mu$ l) were carried out on ice in 10 mM Tris, 60 mM KCl, pH  
439 7.52. Briefly, 1  $\mu$ L of DNA was titrated with varying aliquots of RsrR. 2  $\mu$ L of loading dye  
440 (containing 0.01% (w/v) bromophenol blue), was added and the reaction mixtures were  
441 immediately separated at 30 mA on a 5% (w/v) polyacrylamide gel in 1 X TBE (89 mM  
442 Tris, 89 mM boric acid, 2 mM EDTA), using a Mini Protean III system (Bio-Rad). Gels were  
443 visualized (excitation, 488 nm; emission, 530 nm) on a molecular imager FX Pro (Bio-Rad).  
444 Polyacrylamide gels were pre-run at 30 mA for X min prior to use. For investigations of  
445  $[2\text{Fe-2S}]^{1+}$  RsrR DNA binding, in order to maintain the cluster in the reduced state, 5 mM of  
446 sodium dithionite was added to the isolated protein and the running buffer (de-gassed for 50  
447 min prior to running the gel). Analysis by UV-visible spectroscopy confirmed that the cluster  
448 remained reduced under these conditions.

449

450 **Funding information.** We are grateful to the Natural Environment Research Council for a  
451 PhD studentship to John Munnoch, to the Biotechnology and Biological Sciences Research  
452 Council for the award of grant BB/J003247/1 (to NLB and MIH), to the UEA Science  
453 Faculty for a PhD studentship to Maria Teresa Pellicer Martinez. The funders had no role in  
454 study design, data collection and interpretation, or the decision to submit the work for  
455 publication.

456

457 **Acknowledgements.** We are grateful to Dr Govind Chandra at the John Innes Centre for  
458 advice about ChIP- and dRNA-seq data analysis and to UEA for supporting the mass  
459 spectrometry facility. The research presented in this paper was carried out on the High

460 Performance Computing Cluster supported by the Research and Specialist Computing  
461 Support service at the University of East Anglia.

462

463

464

465 **Acknowledgements.** We are grateful to Dr Govind Chandra at the John Innes Centre for  
466 advice about ChIP- and dRNA-seq data analysis. The research presented in this paper was  
467 carried out on the High Performance Computing Cluster supported by the Research and  
468 Specialist Computing Support service at the University of East Anglia.

469

#### 470 **References**

- 471 1. **Newman DJ, Cragg GM.** 2012. Natural products as sources of new drugs over the 30  
472 years from 1981 to 2010. *J Nat Prod* **75**:311–335.
- 473 2. **Challis GL, Hopwood D a.** 2003. Synergy and contingency as driving forces for the  
474 evolution of multiple secondary metabolite production by *Streptomyces* species. *Proc*  
475 *Natl Acad Sci U S A* **100 Suppl** :14555–14561.
- 476 3. **Glazebrook M a, Doull JL, Stuttard C, Vining LC.** 1990. Sporulation of  
477 *Streptomyces venezuelae* in submerged cultures. *J Gen Microbiol* **136**:581–8.
- 478 4. **Pullan ST, Chandra G, Bibb MJ, Merrick M.** 2011. Genome-wide analysis of the  
479 role of GlnR in *Streptomyces venezuelae* provides new insights into global nitrogen  
480 regulation in actinomycetes. *BMC Genomics* **12**:175.
- 481 5. **Flårdh K, Buttner MJ.** 2009. *Streptomyces* morphogenetics: dissecting  
482 differentiation in a filamentous bacterium. *Nat Rev Microbiol* **7**:36–49.
- 483 6. **Rodríguez H, Rico S, Díaz M, Santamaría RI.** 2013. Two-component systems in  
484 *Streptomyces*: key regulators of antibiotic complex pathways. *Microb Cell Fact* **12**:127.

- 485 7. **van Keulen G, Alderson J, White J, Sawers RG.** 2007. The obligate aerobic  
486 actinomycete *Streptomyces coelicolor* A3(2) survives extended periods of anaerobic  
487 stress. *Environ Microbiol* **9**:3143–9.
- 488 8. **Johnson EG, Sparks JP, Dzikovski B, Crane BR, Gibson DM, Loria R.** 2008.  
489 Plant-pathogenic *Streptomyces* species produce nitric oxide synthase-derived nitric  
490 oxide in response to host signals. *Chem Biol* **15**:43–50.
- 491 9. **Sasaki Y, Oguchi H, Kobayashi T, Kusama S, Sugiura R, Moriya K, Hirata T,**  
492 **Yukioka Y, Takaya N, Yajima S, Ito S, Okada K, Ohsawa K, Ikeda H, Takano H,**  
493 **Ueda K, Shoun H.** 2016. Nitrogen oxide cycle regulates nitric oxide levels and  
494 bacterial cell signaling. *Sci Rep* **6**:22038.
- 495 10. **Crack JC, Svistunenko DA, Munnoch J, Thomson AJ, Hutchings MI, Le Brun**  
496 **NE.** 2016. Differentiated, promoter-specific response of [4Fe-4S] NsrR DNA-binding  
497 to reaction with nitric oxide. *J Biol Chem* jbc.M115.693192.
- 498 11. **Crack J, Munnoch J, Dodd E, Knowles F, Al Bassam M, Kamali S, Holland A,**  
499 **Cramer S, Hamilton C, Johnson M, Thomson A, Hutchings M, Le Brun N.** 2015.  
500 NsrR from *Streptomyces coelicolor* is a Nitric Oxide-Sensing [4Fe-4S] Cluster Protein  
501 with a Specialized Regulatory Function. *J Biol Chem* **290**:12689–12704.
- 502 12. **Gardner PR, Gardner AM, Brashear WT, Suzuki T, Hvitved AN, Setchell KDR,**  
503 **Olson JS.** 2006. Hemoglobins dioxygenate nitric oxide with high fidelity. *J Inorg*  
504 *Biochem* **100**:542–550.
- 505 13. **Poole RK, Hughes MN.** 2000. New functions for the ancient globin family: Bacterial  
506 responses to nitric oxide and nitrosative stress. *Mol Microbiol* **36**:775–783.
- 507 14. **Forrester MT, Foster MW.** 2012. Protection from nitrosative stress: a central role for  
508 microbial flavohemoglobin. *Free Radic Biol Med* **52**:1620–33.
- 509 15. **Hibbing ME, Fuqua C.** 2011. Antiparallel and interlinked control of cellular iron

- 510 levels by the Irr and RirA regulators of *Agrobacterium tumefaciens*. *J Bacteriol*  
511 **193**:3461–3472.
- 512 16. **Santos J a., Pereira PJB, Macedo-Ribeiro S.** 2015. What a difference a cluster  
513 makes: The multifaceted roles of IscR in gene regulation and DNA recognition.  
514 *Biochim Biophys Acta - Proteins Proteomics* 1–12.
- 515 17. **Nicol JW, Helt GA, Blanchard SG, Raja A, Loraine AE.** 2009. The Integrated  
516 Genome Browser: Free software for distribution and exploration of genome-scale  
517 datasets. *Bioinformatics* **25**:2730–2731.
- 518 18. **Bailey TL, Boden M, Buske F a, Frith M, Grant CE, Clementi L, Ren J, Li WW,**  
519 **Noble WS.** 2009. MEME SUITE: tools for motif discovery and searching. *Nucleic*  
520 *Acids Res* **37**:W202–8.
- 521 19. **Brekasis D, Paget MSB.** 2003. A novel sensor of NADH / NAD + redox poise in  
522 *Streptomyces coelicolor* A3 ( 2 ). *EMBO J* **22**.
- 523 20. **Branchu P, Matrat S, Vareille M, Garrivier A, Durand A, Crépin S, Harel J,**  
524 **Jubelin G, Gobert AP.** 2014. NsrR, GadE, and GadX Interplay in Repressing  
525 Expression of the *Escherichia coli* O157:H7 LEE Pathogenicity Island in Response to  
526 Nitric Oxide. *PLoS Pathog* **10**.
- 527 21. **Chhabra S, Spiro S.** 2015. Inefficient translation of nsrR constrains behavior of the  
528 NsrR regulon in *Escherichia coli*. *Microbiology*.
- 529 22. **Partridge JD, Bodenmiller DM, Humphrys MS, Spiro S.** 2009. NsrR targets in the  
530 *Escherichia coli* genome: New insights into DNA sequence requirements for binding  
531 and a role for NsrR in the regulation of motility. *Mol Microbiol* **73**:680–694.
- 532 23. **Kimura S, Kikuchi A, Senda T, Shiro Y, Fukuda M.** 2005. Tolerance of the Rieske-  
533 type [2Fe-2S] cluster in recombinant ferredoxin BphA3 from *Pseudomonas* sp.  
534 KKS102 to histidine ligand mutations. *Biochem J* **388**:869–78.

- 535 24. **Lin J, Zhou T, Ye K, Wang J.** 2007. Crystal structure of human mitoNEET reveals  
536 distinct groups of iron sulfur proteins. *Proc Natl Acad Sci U S A* **104**:14640–14645.
- 537 25. **Stephens PJ, Thomson a J, Dunn JB, Keiderling T a, Rawlings J, Rao KK, Hall**  
538 **DO.** 1978. Circular dichroism and magnetic circular dichroism of iron-sulfur proteins.  
539 *Biochemistry* **17**:4770–4778.
- 540 26. **Link TA, Hatzfeld OM, Unalkat P, Shergill JK, Cammack R, Mason JR.** 1996.  
541 Comparison of the “Rieske” [2Fe-2S] center in the bc1 complex and in bacterial  
542 dioxygenases by circular dichroism spectroscopy and cyclic voltammetry.  
543 *Biochemistry* **35**:7546–7552.
- 544 27. **Couture MMJ, Colbert CL, Babini E, Rosell FI, Mauk AG, Bolin JT, Eltis LD.**  
545 2001. Characterization of BphF, a Rieske-type ferredoxin with a low reduction  
546 potential. *Biochemistry* **40**:84–92.
- 547 28. **Zhang B, Crack JC, Subramanian S, Green J, Thomson AJ, Le Brun NE,**  
548 **Johnson MK.** 2012. Reversible cycling between cysteine persulfide-ligated [2Fe-2S]  
549 and cysteine-ligated [4Fe-4S] clusters in the FNR regulatory protein. *Proc Natl Acad*  
550 *Sci.*
- 551 29. **Lee K-L, Singh AK, Heo L, Seok C, Roe J-H.** 2015. Factors affecting redox  
552 potential and differential sensitivity of SoxR to redox-active compounds. *Mol*  
553 *Microbiol* n/a–n/a.
- 554 30. **Lamb HK, Leslie K, Dodds AL, Nutley M, Cooper A, Johnson C, Thompson P,**  
555 **Stammers DK, Hawkins AR.** 2003. The negative transcriptional regulator NmrA  
556 discriminates between oxidized and reduced dinucleotides. *J Biol Chem* **278**:32107–  
557 32114.
- 558 31. **Mishra S, Imlay J.** 2012. Why do bacteria use so many enzymes to scavenge  
559 hydrogen peroxide? *Arch Biochem Biophys* **525**:145–160.

- 560 32. **Youn HD, Kim EJ, Roe JH, Hah YC, Kang SO.** 1996. A novel nickel-containing  
561 superoxide dismutase from *Streptomyces* spp. *Biochem J* **318** ( Pt 3:889–896.
- 562 33. **Hahn J, Oh S, Roe J.** 2002. Role of OxyR as a peroxide-sensing positive regulator in  
563 *Streptomyces coelicolor* A3(2). *J Bacteriol* **184**:5214–5222.
- 564 34. **Kim M-S, Dufour YS, Yoo JS, Cho Y-B, Park J-H, Nam G-B, Kim HM, Lee K-L,**  
565 **Donohue TJ, Roe J-H.** 2012. Conservation of thiol-oxidative stress responses  
566 regulated by SigR orthologues in actinomycetes. *Mol Microbiol* **85**:326–44.
- 567 35. **Oh SY, Shin JH, Roe JH.** 2007. Dual role of OhrR as a repressor and an activator in  
568 response to organic hydroperoxides in *Streptomyces coelicolor*. *J Bacteriol* **189**:6284–  
569 6292.
- 570 36. **Shin JH, Singh AK, Cheon DJ, Roe JH.** 2011. Activation of the SoxR regulon in  
571 *Streptomyces coelicolor* by the extracellular form of the pigmented antibiotic  
572 actinorhodin. *J Bacteriol* **193**:75–81.
- 573 37. **McLaughlin KJ, Strain-Damerell CM, Xie K, Brekasis D, Soares AS, Paget MSB,**  
574 **Kielkopf CL.** 2010. Structural Basis for NADH/NAD<sup>+</sup> Redox Sensing by a Rex  
575 Family Repressor. *Mol Cell* **38**:563–575.
- 576 38. **Stuttard C.** 1982. Temperate Phages of *Streptomyces venezuelae*: Lysogeny and Host  
577 Specificity Shown by Phages SV1 and SV2. *Microbiology* **128**:115–121.
- 578 39. **Kieser T, Bibb MJ, Buttner MJ, Chater KF, Hopwood DA.** 2000. Practical  
579 *Streptomyces* Genetics. John Innes Cent Ltd 529.
- 580 40. **Gust B, Challis GL, Fowler K, Kieser T, Chater KF.** 2003. PCR-targeted  
581 *Streptomyces* gene replacement identifies a protein domain needed for biosynthesis of  
582 the sesquiterpene soil odor geosmin. *Proc Natl Acad Sci U S A* **100**:1541–6.
- 583 41. **Thompson BJ, Widdick D a, Hicks MG, Chandra G, Sutcliffe IC, Palmer T,**  
584 **Hutchings MI.** 2010. Investigating lipoprotein biogenesis and function in the model



- 585 Gram-positive bacterium *Streptomyces coelicolor*. *Mol Microbiol* **77**:943–957.
- 586 42. **Hutchings MI, Hong H-J, Buttner MJ**. 2006. The vancomycin resistance VanRS  
587 two-component signal transduction system of *Streptomyces coelicolor*. *Mol Microbiol*  
588 **59**:923–35.
- 589 43. **Al-Bassam MM, Bibb MJ, Bush MJ, Chandra G, Buttner MJ**. 2014. Response  
590 regulator heterodimer formation controls a key stage in *Streptomyces* development.  
591 *PLoS Genet* **10**:e1004554.
- 592 44. **Reja R, Vinayachandran V, Ghosh S, Pugh BF**. 2015. Molecular mechanisms of  
593 ribosomal protein gene coregulation. *Genes Dev* **29**:1942–1954.
- 594 45. **Amman F, Wolfinger MT, Lorenz R, Hofacker IL, Stadler PF, Findeiß S**. 2014.  
595 TSSAR: TSS annotation regime for dRNA-seq data. *BMC Bioinformatics* **15**:89.
- 596 46. **Bradford MM**. 1976. A rapid and sensitive method for the quantitation of microgram  
597 quantities of protein utilizing the principle of protein-dye binding. *Anal Biochem*  
598 **72**:248–254.
- 599 47. **Crack J, Green J, Le Brun N, Thomson A**. 2006. Detection of Sulfide Release from  
600 the Oxygen-sensing [4Fe-4S] Cluster of FNR. *J Biol Chem* **281**:18909–18913.
- 601 48. **Kibbe WA**. 2007. OligoCalc: An online oligonucleotide properties calculator. *Nucleic*  
602 *Acids Res* **35**:43–46.

603

604

## 605 **Figure Legends**

### 606 **Table 1. Combined ChIP-Seq and dRNA-Seq data for selected RsrR targets.**

607 <sup>a</sup> – Genes flanking the ChIP peak.

608 <sup>b</sup> – Distance to the translational start codon (bp).

609 <sup>c</sup> – Distance to the transcriptional start site (bp).

610 <sup>d</sup> – Fold change WT vs. Mutant, values normalised per million reads per sample

611 <sup>e</sup> – EMSA shift reactions have been carried out successfully and specifically

612 <sup>f</sup> – A fold change <-2 or >2

613 \_ - Class 1 targets.

614

615 **FIG. 1. Defining the regulon and binding site for RsrR.** Top panel (A) shows the whole  
616 genome ChIP-seq analysis with class 1 sites labelled in black. The frequency of each base  
617 sequenced is plotted with genomic position on the x-axis and frequency of each base  
618 sequenced on the y-axis for *S. venezualae* (NC\_018750). Bottom panel (B) shows the class 1  
619 and 2 web logos generated following MEME analysis of the ChIP-seq data.

620

621 **FIG 2. Spectroscopic characterization of RsrR.** UV-visible absorption (A), CD (B) and  
622 EPR spectra (C) of 309  $\mu$ M [2Fe-2S] RsrR (~75% cluster-loaded). Black lines – as isolated,  
623 red lines – oxidised, grey lines reduced proteins. In A and B, initial exposure to ambient O<sub>2</sub>  
624 for 30 min was followed by 309  $\mu$ M sodium dithionite treatment; in C – as isolated protein  
625 was first anaerobically reduced by 309  $\mu$ M sodium dithionite and then exposed to ambient O<sub>2</sub>  
626 for 50 min. A 1 mm pathlength cuvette was used for optical measurements. Inset in (A)  
627 shows details of the iron-sulfur cluster absorbance in the 300 – 700 nm region.

628 **FIG 3. Native mass spectrometry of RsrR.** (A) and (B) Positive ion mode ESI-TOF native  
629 mass spectrum of ~21  $\mu$ M [2Fe-2S] RsrR in 250 mM ammonium acetate pH 8.0, in the RsrR  
630 monomer (A) and dimer (B) regions. Full *m/z* spectra were deconvoluted with Bruker  
631 Compass Data analysis with the Maximum Entropy plugin.

632

633 **FIG 4. Cluster- and oxidation state-dependent DNA binding by [2Fe-2S] RsrR.** EMSAs  
634 showing DNA probes unbound (U), bound (B), and non-specifically bound (NS) by (A) [2Fe-

635  $2S]^{2+}$  and apo-RsrR, (B)  $[2Fe-2S]^{2+}$  RsrR and (C)  $[2Fe-2S]^{1+}$  RsrR. Ratios of  $[2Fe-2S]$  RsrR  
636 and  $[RsrR]$  to DNA are indicated. DNA concentration was 3.5 nM for the  $[2Fe-2S]^{2+/1+}$  and  
637 apo-RsrR experiments. For (A) and (B) the reaction mixtures were separated at 30 mA for 50  
638 min and the polyacrylamide gels were pre-run at 30 mA for 2 min prior to use. For (C) the  
639 reaction mixtures were separated at 30 mA for 1h 45 min and the polyacrylamide gel was  
640 pre-run at 30 mA for 50 min prior to use using the de-gassed running buffer containing 5 mM  
641 sodium dithionite.

642

643 **FIG 5. Oxidised RsrR binding to full site (class 1) and half site (class 2) RsrR targets.**

644 EMSAs showing DNA probes unbound (U) and bound (B) by  $[2Fe-2S]^{2+}$ . Ratios of  $[2Fe-2S]$   
645 RsrR and  $[RsrR]$  to DNA are indicated. DNA concentration was 20 nM for each probe.  
646 EMSA's using class 2 promoters *sven0247* and *sven0519* (A), class 1 probes from the RsrR  
647 *rsrR* binding region (B) and the four possible half sites from the *rsrR* class 1 sites (C) were  
648 used. For (A) the reaction mixtures were separated at 30 mA for 1h and the polyacrylamide  
649 gel was pre-run at 30 mA for 2 min prior to use. For (B) and (C) the reaction mixtures were  
650 separated at 30 mA for 30 min and the polyacrylamide gels were pre-run at 30 mA for 2 min  
651 prior to use.

652

653 **FIG 6. Graphical representation of combined ChIP-Seq, ChIP-exo and dRNA-seq for**

654 **four class 1 targets.** Each target has the relative position of ChIP-exo (blue line) peak centre  
655 (dotted line) and putative transcriptional start site (TSS - solid arrow) indicated with the  
656 distance in bp (black numbers) relative to the down stream start codon of target genes. The y-  
657 axis scale corresponds to number of reads for ChIP data with each window corresponding to  
658 200 bp with each ChIP-peak being ~50 bp wide. Above each is the relative binding site

659 sequence coloured following the weblogo scheme (A – red, T – green, C – blue and G –  
660 yellow) from the MEME results.

661

662 **Supplementary FIG S1. Sven6563 is not an NsrR homologue.** Top panel, alignment of *S.*  
663 *coelicolor* NsrR (ScNsrR) with the annotated NsrR protein in *S. venezuelae* (Sven6563)  
664 reveals only 27% amino acid identity. Bottom panel, *Streptomyces* NsrR proteins are  
665 genetically linked to genes encoding the NO dioxygenase HmpA, e.g. shown here in *S.*  
666 *coelicolor* where ScNsrR regulates itself and both HmpA homologues and is linked to *hmpA1*.  
667 ScNsrR binding sites are shown as orange boxes. *S. venezuelae* does not encode an HmpA  
668 homologue and Sven6563 is divergently transcribed from *sven6562* which encodes a LysR  
669 family regulator with an NmrA-type NAD/NADP binding domain. NmrA (PMID: 12764138)  
670 is a transcriptional repressor in fungi which can distinguish between oxidised and reduced  
671 NAD and NADP and may be a redox sensor. Both *sven6562* and *sven6563* are repressed by  
672 Sven6563 binding to two adjoining 25 bp sites.

673

674 **Supplementary FIG S2. RsrR homologues from DELTA BLASTP.** Alignment of *S.*  
675 *venezuelae* Sven6563 (RsrR) with the top hits from a DELTA BLASTP search, all have  
676 >70% identity and all are in filamentous actinomycetes. The other hits in the top 100 were all  
677 IscR proteins from proteobacteria with 25-27% identity to RsrR. The three cysteine residues  
678 that most likely ligate the cluster are boxed.

679

680 **Supplementary data File S3.1 – S3.2.** Contained within this excel sheet are the tab-  
681 delimited results of CHIP-seq and dRNA-seq results wt vs *rsrR::apr* of *S. venezuelae* (16 hour  
682 time point). CHIP-seq (cut offs of >0, (S3.1) >200 (S3.2) and >500 reads (S3.3) - combined  
683 and standalone CHIP data (S3.4) and dRNA-seq (both gene expression results (S3.5) and

684 TSSAR defined Transcriptional start sites (for WT +ve strand (S3.6), WT -ve strand (S3.7),  
685 mutant +ve strand (S3.8 and Mutant -ve strand (S3.9). Columns A-D - ChIP-seq analysis was  
686 carried out using the default setting of CLC workbench 8 producing. Columns E-O -  
687 produced by taking the closest Transcriptional start codon upstream (5' end) of the ChIP-peak  
688 and P-Y by taking the closest Transcriptional start codon downstream (3' end) from the ChIP-  
689 peak. Column F and Q - The location of the 5' Start codon. Column G and R - The location of  
690 the associated 5' TSS. Column H and S - the number of bases from the ChIP-peak centre to the  
691 gene (this value is independent of orientation so the peak maybe at the 3' end of the gene  
692 ultimately indicating why numbers may be in the thousands). (e.g. column B - H or B - S).  
693 Column I and T - the number of bases from the ChIP-peak centre to the TSS. (e.g. column B  
694 - I or B - T). Column J and U - The TSS class as defined by TSSAR in this sheet only P was  
695 retained standing for primary TSS (within 250 bp of the gene start site upstream 5'-3').  
696 Column K and V - The TSSAR comment indicating where the TSS is in regards to its gene.  
697 Column L and W - The RNA-seq Fold change of WT vs mutant (*rsrR::apr*). Column M and  
698 X - Regulation type of the WT vs Mutant (up regulated indicating that expression is higher in  
699 the mutant background). Column N and Y - The gene annotation for each target from the  
700 NC\_018750.1.ptt file.

701

702 **Supplementary data File S3.3.** Contained within this excel sheet are the tab-delimited  
703 results of ChIP-seq and dRNA-seq results wt vs *rsrR::apr* of *S. venezualae* ChIP-seq (cut offs  
704 of >500 reads (3.3) - combined dRNA-seq expression results and TSSAR defined  
705 Transcriptional start sites (for WT +ve strand, WT -ve strand, mutant +ve strand Mutant -ve  
706 strand. Column A - gene numbers identified by taking the most likely associated gene (e.g.  
707 closest gene, downstream of the binding sequence). Column B - The location of the 5' Start  
708 codon. Column C - The location of the associated 5' TSS. Column D - the number of bases

709 from the ChIP-peak centre to the gene (this value is independent of orientation so the peak  
710 maybe at the 3' end of the gene ultimately indicating why numbers may be in the thousands).  
711 Column E - the number of bases from the ChIP-peak centre to the TSS. Column F - The TSS  
712 class as defined by TSSAR in this sheet only P was retained standing for primary TSS  
713 (within 250 bp of the gene start site upstream 5'-3'). Column G - The TSSAR comment  
714 indicating where the TSS is in regards to its gene. Column H - The RNA-seq Fold change of  
715 WT vs mutant (*rsrR::apr*). Column I - Regulation type of the WT vs Mutant (up regulated  
716 indicating that expression is higher in the mutant background). Column J - The gene  
717 annotation for each target from the NC\_018750.1.ptt file.

718

719 **Supplementary data File 3.4.** CLC workbench 8 results of WT *S. venezualae* vs mutant  
720 (*rsrR::apr pMs82 3xFlag rsrR*). Columns A - The called peak region. Column B - The left  
721 edge of the peak. Column C - The right edge of the peak. Column D - The centre of the peak.  
722 Column E - The width of the peak (C-B)

723

724 **Supplementary data File 3.5.** Contained in this sheet are the RNA-seq expression results of  
725 WT and RsrR mutant using the default setting of CLC workbench 8. Column A -  
726 *Streptomyces venezualae* gene number (from genome NC\_018750.1). Columns B-F -  
727 Experimental results of WT vs. Mutant. Column G-L - WT expression results. Column M-R -  
728 *rsrR::apr* (mutant) expression results. Normalisation was carried out per million reads  
729 mapped.

730

731 **Supplementary data File 3.6.** Contained in this sheet are the dRNA-seq transcriptional start  
732 site (TSS) identification results (WT +ve strand) from the TSSAR webservice  
733 (<http://nibiru.tbi.univie.ac.at/TSSAR/>) - doi:10.1186/1471-2105-15-89 Settings: p-value =

734 1e-4, noise threshold = 2 and merge range = 5 (with a 1000 bp window). Column A -  
735 *Streptomyces venezualae* gene number (from genome NC\_018750.1). Columns B-F -  
736 Experimental results of WT vs. Mutant. Column G-L - WT expression results. Column M-R -  
737 *rsrR::apr* (mutant) expression results. Normalisation was carried out per million reads  
738 mapped.

739

740 **Supplementary data File 3.7.** Contained in this sheet are the dRNA-seq transcriptional start  
741 site (TSS) identification results (WT -ve strand) from the TSSAR webservice  
742 (<http://nibiru.tbi.univie.ac.at/TSSAR/>) - doi:10.1186/1471-2105-15-89 Settings: p-value =  
743 1e-4, noise threshold = 2 and merge range = 5 (with a 1000 bp window). Column A -  
744 *Streptomyces venezualae* gene number (from genome NC\_018750.1). Columns B-F -  
745 Experimental results of WT vs. Mutant. Column G-L - WT expression results. Column M-R -  
746 *rsrR::apr* (mutant) expression results. Normalisation was carried out per million reads  
747 mapped.

748

749 **Supplementary data File 3.8.** Contained in this sheet are the dRNA-seq transcriptional start  
750 site (TSS) identification results (*rsrR::apr* +ve strand) from the TSSAR webservice  
751 (<http://nibiru.tbi.univie.ac.at/TSSAR/>) - doi:10.1186/1471-2105-15-89 Settings: p-value =  
752 1e-4, noise threshold = 2 and merge range = 5 (with a 1000 bp window). Column A -  
753 *Streptomyces venezualae* gene number (from genome NC\_018750.1). Columns B-F -  
754 Experimental results of WT vs. Mutant. Column G-L - WT expression results. Column M-R -  
755 *rsrR::apr* (mutant) expression results. Normalisation was carried out per million reads  
756 mapped.

757 **Supplementary data File 3.9.** Contained in this sheet are the dRNA-seq transcriptional start  
758 site (TSS) identification results (*rsrR::apr* +ve strand) from the TSSAR webservice

759 (<http://nibiru.tbi.univie.ac.at/TSSAR/>) - doi:10.1186/1471-2105-15-89 Settings: p-value =  
760 1e-4, noise threshold = 2 and merge range = 5 (with a 1000 bp window). Column A -  
761 *Streptomyces venezualae* gene number (from genome NC\_018750.1). Columns B-F -  
762 Experimental results of WT vs. Mutant. Column G-L - WT expression results. Column M-R -  
763 *rsrR::apr* (mutant) expression results. Normalisation was carried out per million reads  
764 mapped.

765

766 **Supplementary data File 3.10.** Contained in this sheet are the combined ChIP-seq/exo and  
767 dRNA-seq transcriptional start site (TSS) identification results from the TSSAR webservice  
768 (<http://nibiru.tbi.univie.ac.at/TSSAR/>) - doi:10.1186/1471-2105-15-89. Shown specifically  
769 are the Exo peaks that have reported TSS information from the 16h time point. Settings for  
770 TSSAR: p-value = 1e-4, noise threshold = 2 and merge range = 5 (with a 1000 bp window).  
771 Column A - *Streptomyces venezualae* gene number (from genome NC\_018750.1). Columns B-  
772 F - Experimental results of WT vs. Mutant  
773 Column G-L - WT expression results. Column M-R - *rsrR::apr* (mutant) expression results.  
774 Normalisation was carried out per million reads mapped.

775

776 **Supplementary data File S4.** Contained in this file is the class 2 identified MEME binding  
777 site information. This is the raw output of the MEME analysis and includes all MEME  
778 output results.

779

780 **Supplementary data File S5.** Contained in this file is the class 1 identified MEME binding  
781 site information. This is the raw output of the MEME analysis and includes all MEME  
782 output results.

783



784 **Supplementary Fig. S6. Full range native mass spectrum of RsrR.** Positive ion mode  
785 ESI-TOF native mass spectrum of ~21  $\mu$ M [2Fe-2S] RsrR in 250 mM ammonium acetate pH  
786 8.0, The full  $m/z$  spectrum was deconvoluted with Bruker Compass Data analysis with the  
787 Maximum Entropy plugin.

788

789 **Supplementary Table S7. Strains and plasmids used during this study.**

790

791 **Supplementary Table S8. List of primers used in this study.** Primers JM0119-JM0134  
792 were used to produce EMSA DNA templates that were successfully shifted using purified  
793 RsrR and mentioned in the text but the data is not shown as part of the work.



**Table 1. Combined ChIP-Seq and RNA-Seq data for selected RsrR targets.**

| Flanking gene <sup>a</sup> |                             | Distance <sup>b</sup> | Dist. TSS <sup>c</sup> | Fold Change <sup>d</sup>               | Annotation                                                                                                                       |
|----------------------------|-----------------------------|-----------------------|------------------------|----------------------------------------|----------------------------------------------------------------------------------------------------------------------------------|
| Left (-1)                  | Right (+1)                  |                       |                        |                                        |                                                                                                                                  |
|                            | <i>sven0372<sup>e</sup></i> | -2328                 | -2443                  | -1.15                                  | Putative two-component system sensory histidine kinase                                                                           |
|                            | <i>sven0519<sup>e</sup></i> | -993                  |                        | 1.59                                   | Sulfate permease                                                                                                                 |
|                            | <i>sven0772</i>             | -408                  |                        | -1.96                                  | NAD- or NADP-dependent oxidoreductases                                                                                           |
| <i>sven0903</i>            |                             | 1440                  | 1406                   | 1.06                                   | Uracil DNA glycosylase superfamily                                                                                               |
|                            | <i>sven1377</i>             | 29                    |                        | 1.08                                   | DeoR family Transcriptional regulator, HTH domain WYL domain.                                                                    |
| <i>sven1490</i>            |                             | 192                   | 192                    | 2.72 <sup>f</sup>                      | Alpha/beta hydrolase family                                                                                                      |
|                            | <i>sven1561<sup>e</sup></i> | 103                   | 67                     | 1.02                                   | Amidohydrolase                                                                                                                   |
|                            | <i>sven1670</i>             | 17                    |                        | -1.2                                   | Pyridoxamine 5'-phosphate oxidase                                                                                                |
| <i>sven1685</i>            |                             | 1215                  |                        | 1.18                                   | CoA-transferase family III                                                                                                       |
|                            | <i>sven1847<sup>e</sup></i> | 6                     |                        | -1.83                                  | The short-chain dehydrogenases/reductases family (SDR)[2] known to be NAD- or NADP-dependent oxidoreductases                     |
|                            | <i>sven1902</i>             | -1643                 | -1689                  | 1.02                                   | Glutamate-ammonia ligase adenylyltransferase, GlnD PII-uridylyltransferase                                                       |
|                            | <i>sven2177</i>             | -397                  | -440                   | 1.31                                   | citrate lyase beta subunit, C-C_Bond_Lyase of the TIM-Barrel fold                                                                |
|                            | <i>sven2494</i>             | 91                    | 91                     | -1.82                                  | insignificant results showing Transposase/zinc ribbon fragments                                                                  |
|                            | <i>sven2540</i>             | 221                   |                        | -1.9                                   | Oxidoreductase family, NAD-binding Rossmann fold                                                                                 |
| <i>sven2680</i>            | <i>sven2681</i>             | -80, -416             | -146, -374             | -1.12, -69.97 <sup>f</sup>             | ATP or GTP-binding protein, Protease inhibitorDrug resistance transporter, EmrB or QacA family, major fascilitator family domain |
| <i>sven2931</i>            | <i>sven2932</i>             | 48, -103              |                        | -2.43 <sup>f</sup> , 6.48 <sup>f</sup> | Esterase A, Beta-lactamase (fragment)                                                                                            |
|                            | <i>sven3087</i>             | 2092                  | 2092                   | 1.04                                   | Acetyltransferase (GNAT) domain                                                                                                  |
|                            | <i>sven3827<sup>e</sup></i> | -902                  | 36                     | -1.48                                  | SAICAR synthetase                                                                                                                |
| <i>sven3848</i>            | <i>sven3849</i>             | 12, 429               |                        | 69.33 <sup>f</sup> , -1.22             | ATP-dependent helicase, a large c-terminal domain of unknown functionhypothetical protein                                        |
|                            | <i>sven3934</i>             | -1228                 |                        | 1.27                                   | Enhanced intracellular survival protein, Sterol carrier protein domain, Acetyltransferase (GNAT) domain                          |
| <i>sven3970</i>            | <i>sven3971</i>             | 1102, -1647           | 1139                   | 1.13, -1.38                            | SpoU rRNA Methylase family, RNA 2'-O ribose methyltransferase substrate bindingDoxX                                              |

|                             |                             |            |            |                                       |                                                                                                     |
|-----------------------------|-----------------------------|------------|------------|---------------------------------------|-----------------------------------------------------------------------------------------------------|
|                             | <i>sven4022</i>             | -772       |            | -1.78                                 | NAD(P)-binding Rossmann-like domain (fragment)                                                      |
| <i>sven4076</i>             |                             | 375        |            | -1.53                                 | Archaeal seryl-tRNA synthetase-related sequence                                                     |
| <i>sven4272</i>             | <i>sven4273</i>             | 1362-573   |            | 1.141.33                              | NADH-ubiquinone oxidoreductase chain H, I and dicluster domain [4Fe-4S]                             |
| <i>sven4418</i>             |                             | 588        | 589        | 1.3                                   | Glutamine amidotransferase domain (fragment).                                                       |
|                             | <i>sven4888</i>             | -528       |            | 1.8                                   | Glutamate-1-semialdehyde aminotransferase                                                           |
|                             | <i>sven4955</i>             | -602       |            | 1.11                                  | PadR-like family transcriptional regulator                                                          |
|                             | <i>sven5065</i>             | -221       | -252       | 1.63                                  | Putative MarR family transcriptional regulator                                                      |
|                             | <i>sven5088</i>             | -77        |            | -1.02                                 | NAD dependent epimerase/dehydratase family                                                          |
|                             | <i>sven5174<sup>e</sup></i> | -119       |            | -1.09                                 | Quinone oxidoreductase, Zinc-binding dehydrogenase, Alcohol dehydrogenase GroES-like domain         |
| <i>sven5492</i>             | <i>sven5493</i>             | 513, -1899 | 413, -1899 | 1.2; -1.16                            | <i>sven5392</i> , Putative ATP-dependent DNA helicase RecQ like,                                    |
| <i>sven5583</i>             | <i>sven5584</i>             | 594, -1463 |            | 2.14 <sup>f</sup> , 2.33 <sup>f</sup> | Methylisocitrate lyase, Phosphoenolpyruvate phosphomutase2-methylcitrate synthase, Citrate synthase |
| <i>sven5665</i>             | <i>sven5666</i>             | 634, -876  | 492        | 1.01, 2.45 <sup>f</sup>               | Haloacid dehalogenase-like hydrolase, hypothetical protein                                          |
| <i>sven5907</i>             | <i>sven5908</i>             | 1156, -296 | -295       | -2.17 <sup>f</sup> , 1.1              | Bacterial extracellular solute-binding protein (Fragment)domains of unknown function                |
|                             | <i>sven6227</i>             | -1279      |            | -15.99 <sup>f</sup>                   | NADH-FMN oxidoreductase                                                                             |
| <i>sven6534</i>             |                             | 3352       |            | 1.62                                  | Trypsin-like peptidase domain                                                                       |
| <i>sven6562<sup>e</sup></i> | <i>sven6563<sup>e</sup></i> | 72, -35    | 36         | 62.98 <sup>f</sup> , N/A              | <i>nmrA/rsrR</i>                                                                                    |
| <i>sven6836</i>             |                             | 1547       |            | -2.21                                 | FAD binding domain ( Succinate/Fumarate reductase flavoprotein C-term)                              |
| <i>sven7046</i>             | <i>sven7047</i>             | 658, -447  | 591        | 1.16, -1.23                           | Stress-induced transcription regulator, Cobalt transporter subunit (CbtA)                           |
| <i>sven7248</i>             |                             | 538        |            | 3.83 <sup>f</sup>                     | FAD dependent oxidoreductase, Rieske [2Fe-2S] domain                                                |
| <i>sven7284</i>             | <i>sven7285</i>             | -55, -197  | -167       | 1.13, 35.61 <sup>f</sup>              | Transcriptional regulator PadR-like family, Putative transcriptional regulator                      |
| <i>sven7296</i>             | <i>sven7297</i>             | 314, -6    | 137        | 2.33 <sup>f</sup> , -1.33             | Putative integral membrane protein, tetR family transcriptional regulator                           |

<sup>a</sup> – Genes flanking the ChIP peak.

<sup>b</sup> – Distance to the translational start codon (bp).

<sup>c</sup> – Distance to the transcriptional start site (bp).

<sup>d</sup> – Fold change WT vs. Mutant, values normalised per million reads per sample

<sup>e</sup> – EMSA shift reactions have been carried out successfully and specifically

<sup>f</sup> – A fold change <-2 or >2

■ - Class 1 targets.



**A**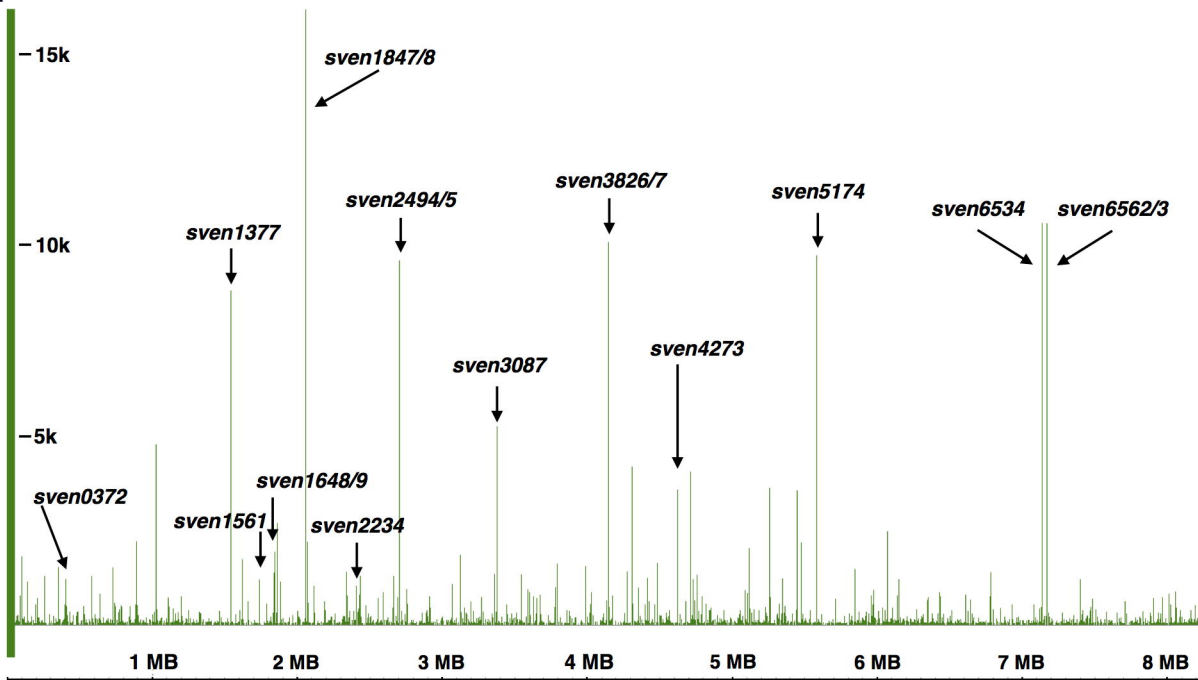**B**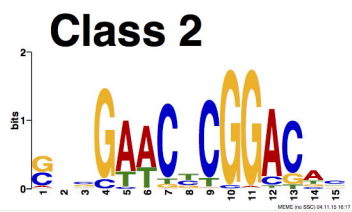**C**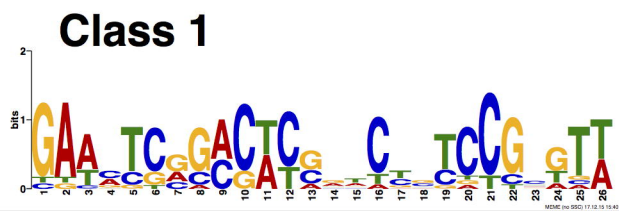

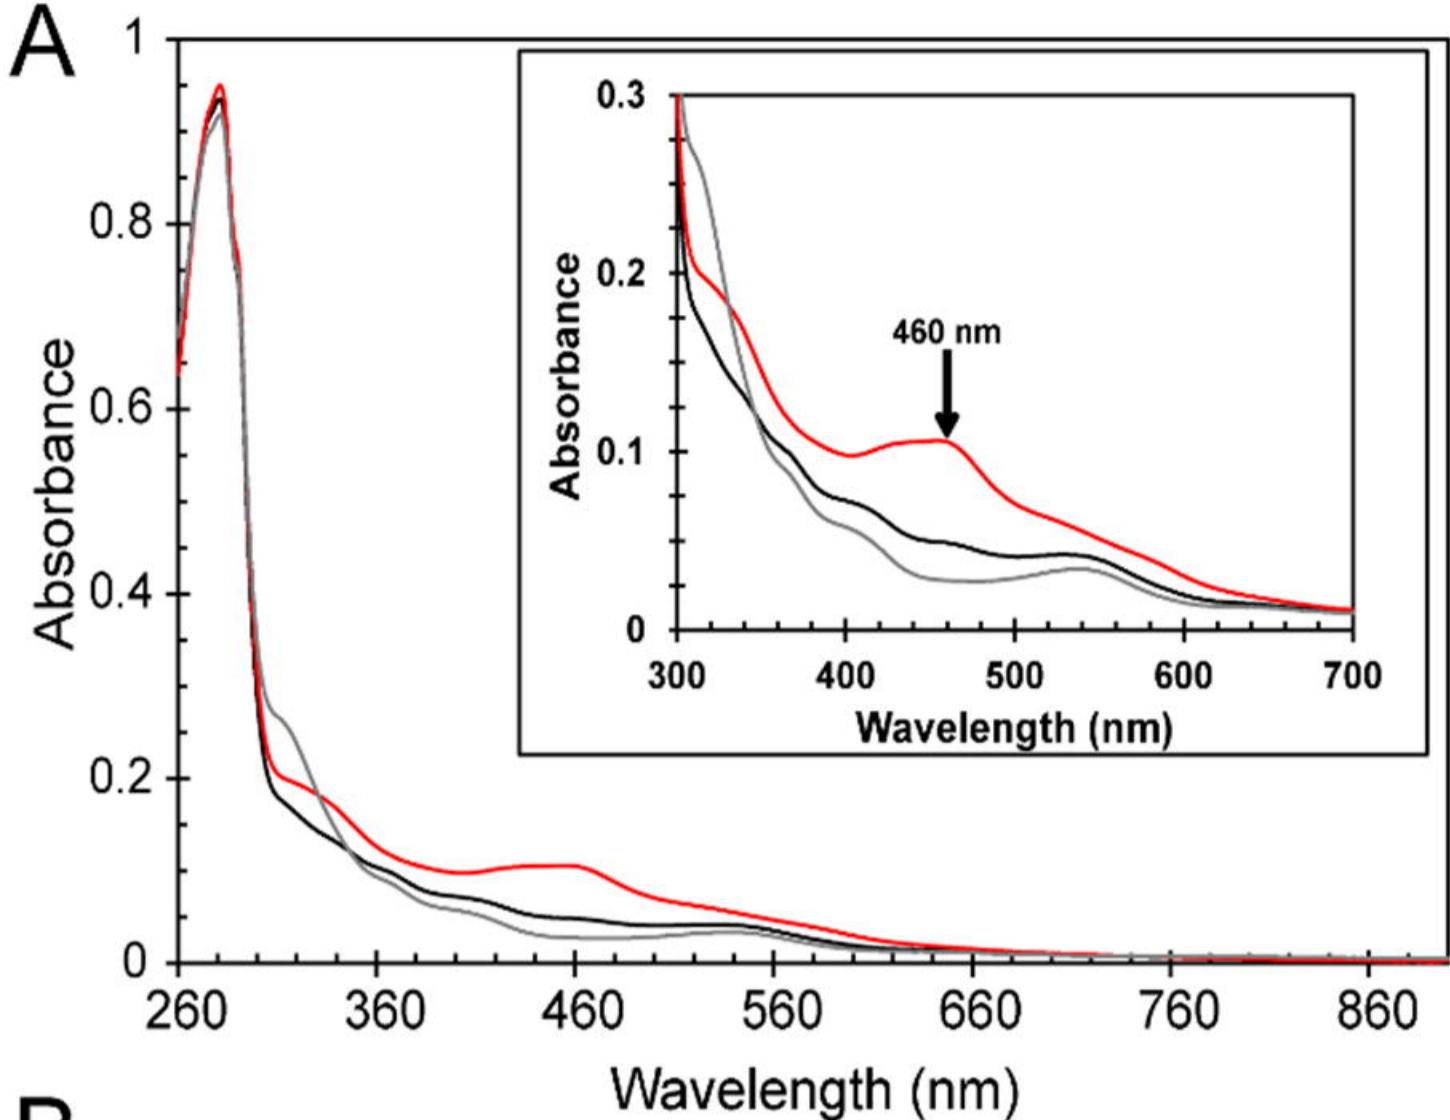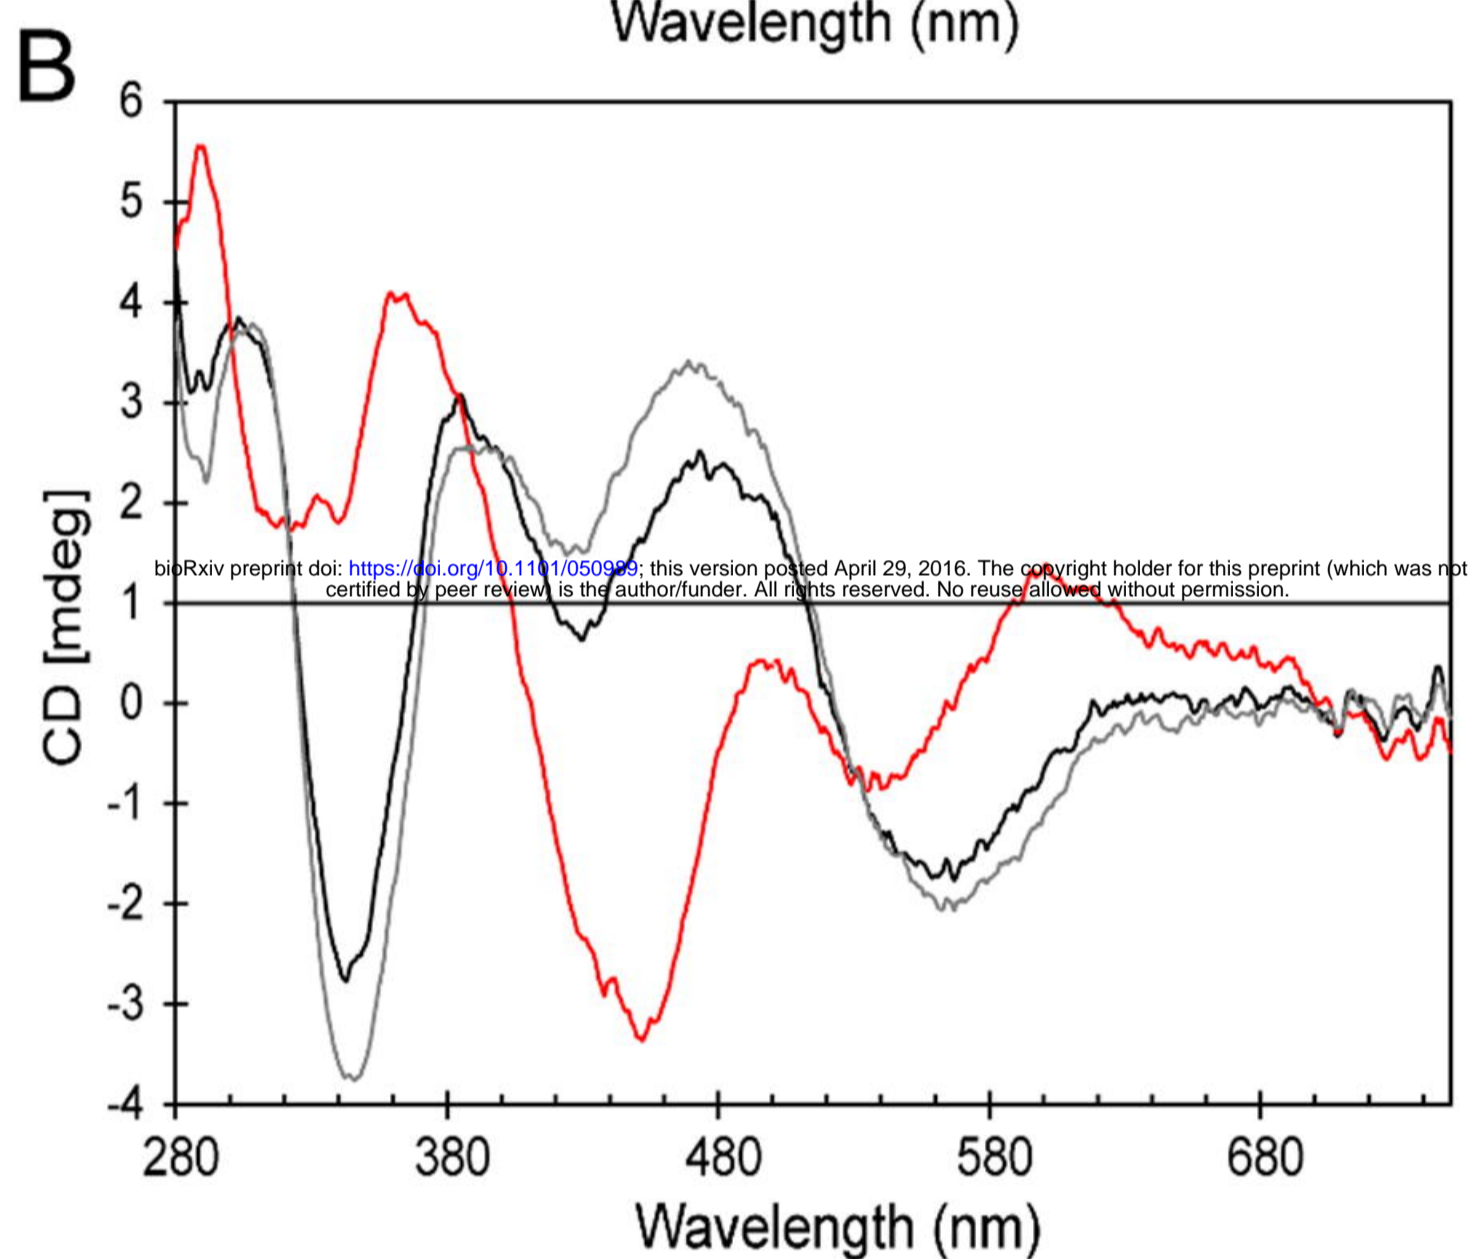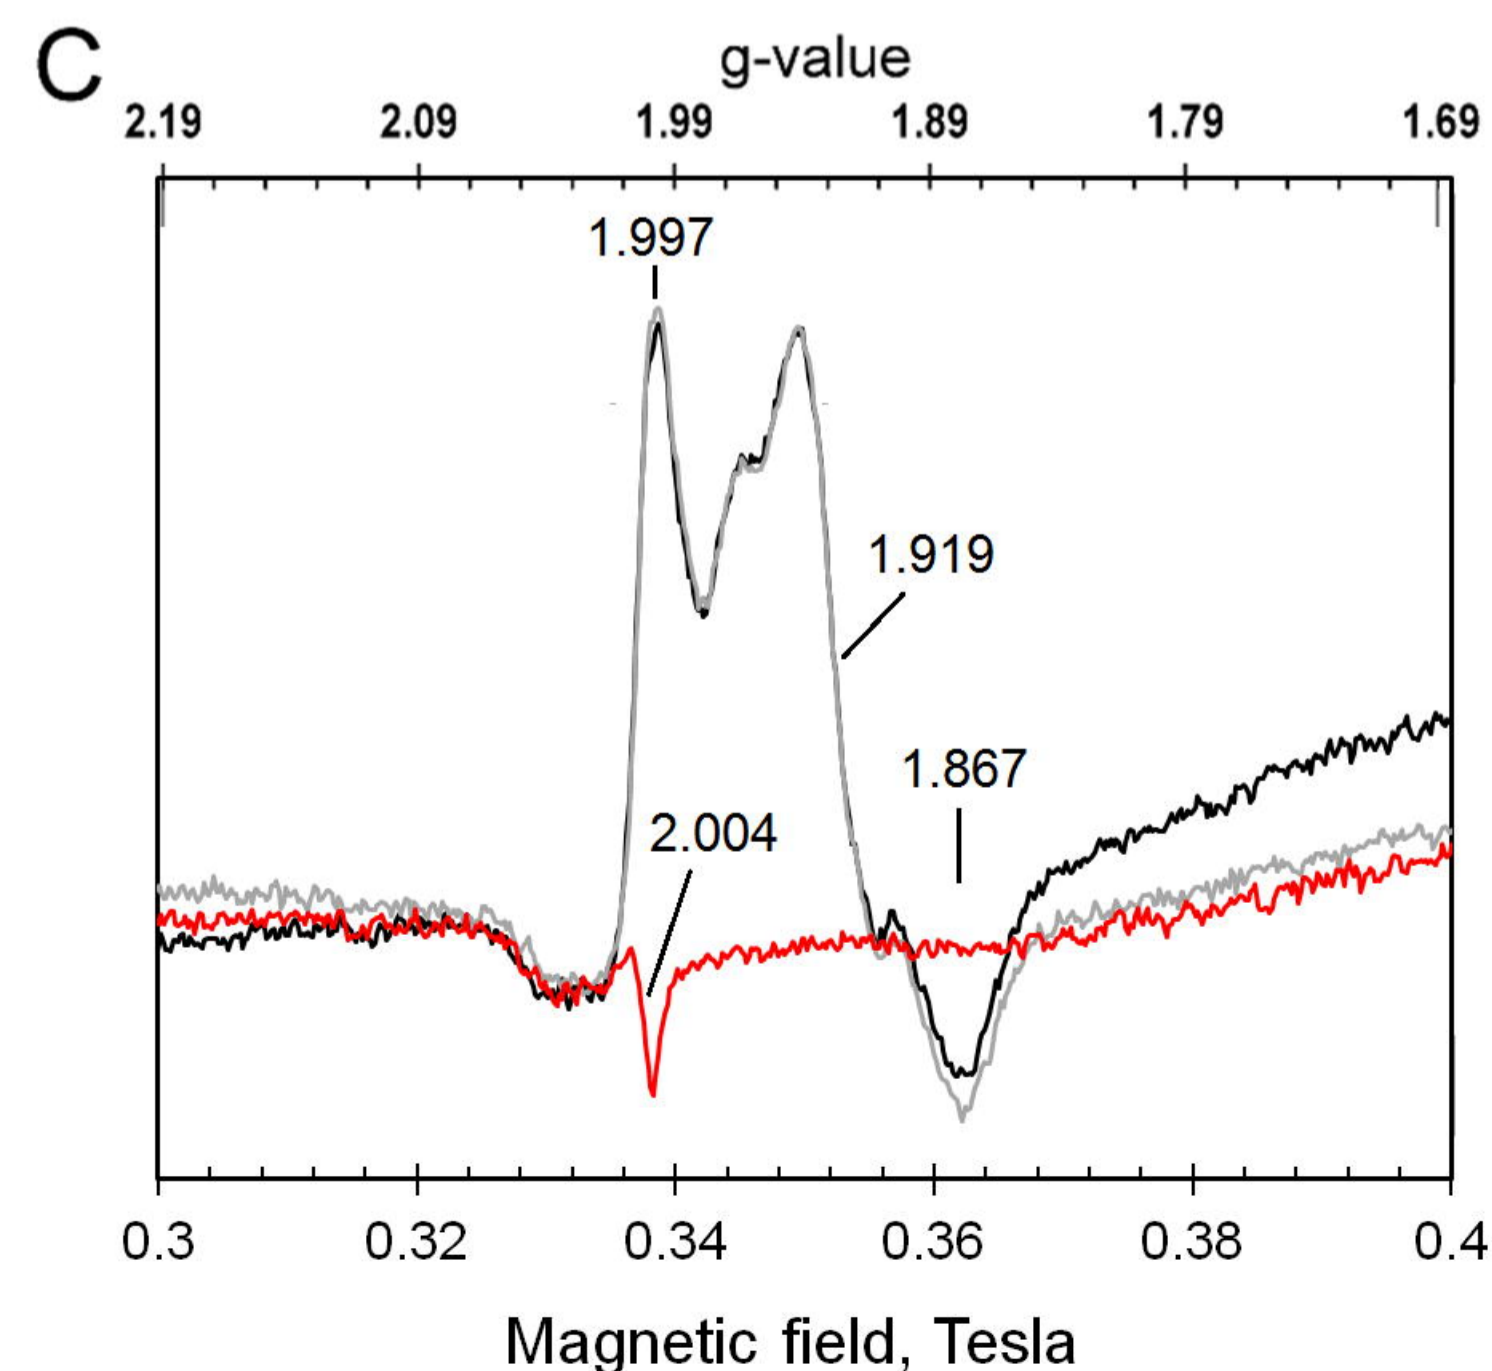

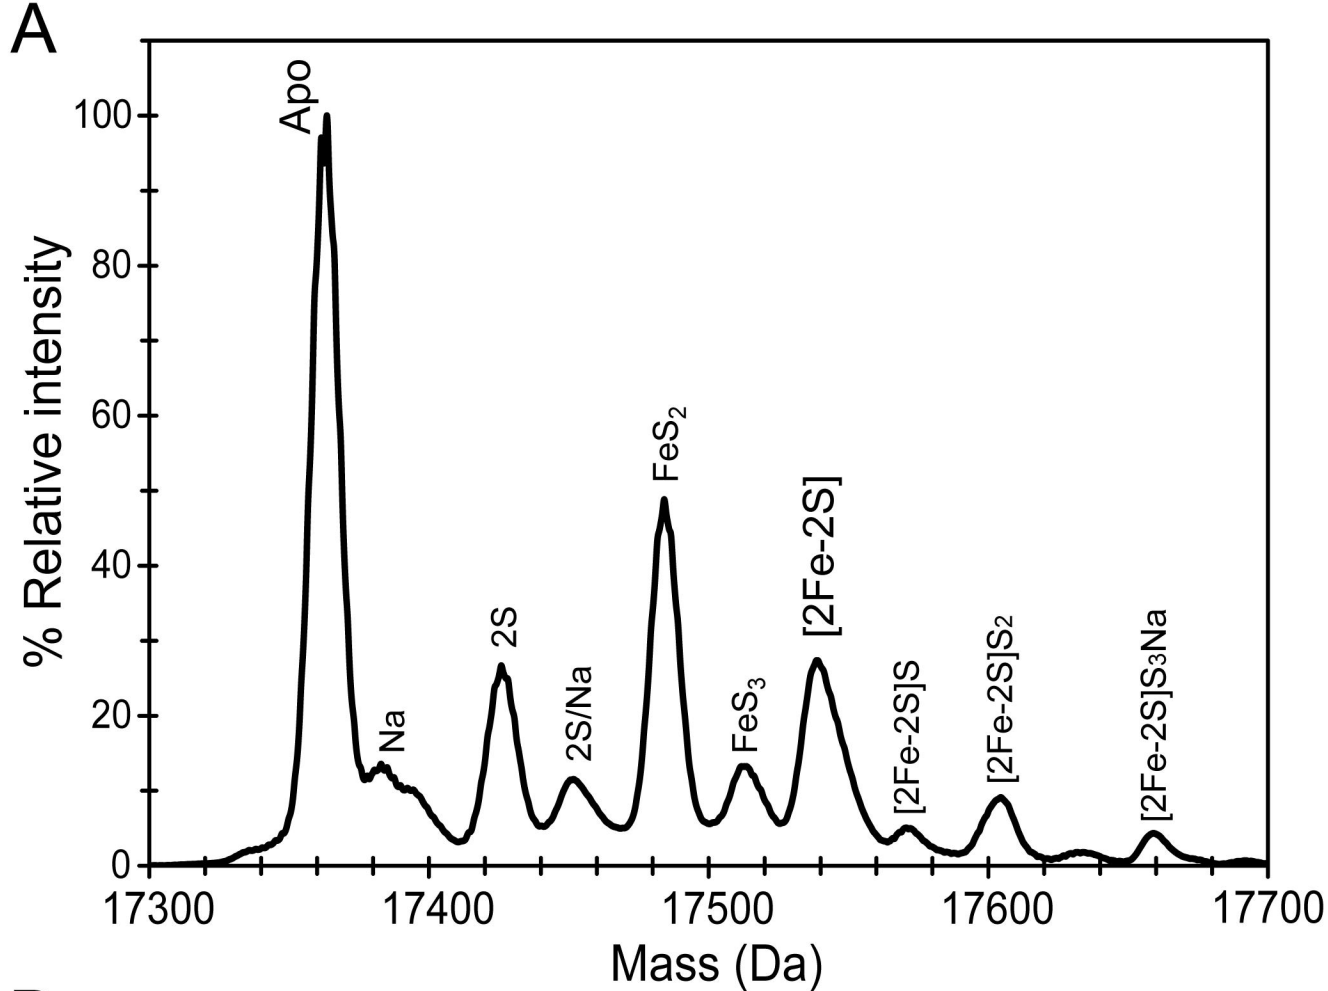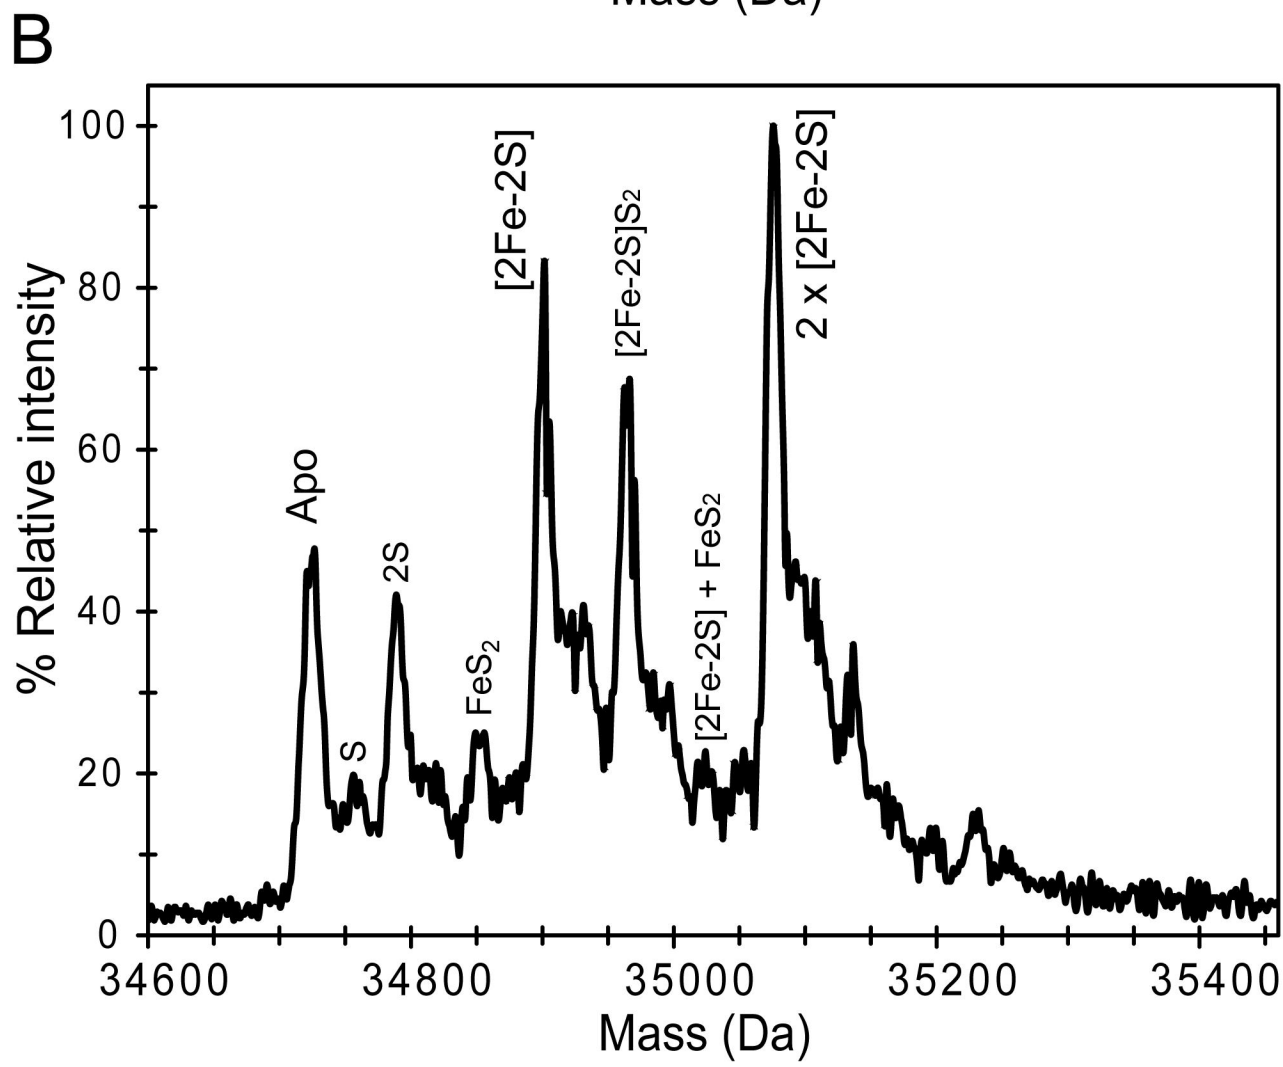



**A**

|                                  |   |    |     |    |     |     |     |
|----------------------------------|---|----|-----|----|-----|-----|-----|
| [2Fe-2S] <sup>2+</sup> RsrR (nM) | - | 60 | 100 | -  | -   | -   | -   |
| Ratio [Fe-S]:DNA                 | - | 17 | 29  | -  | -   | -   | -   |
| Apo RsrR (nM)                    | - | 88 | 147 | 87 | 105 | 122 | 140 |
| Ratio Apo RsrR:DNA               | - | 25 | 42  | 25 | 30  | 35  | 40  |

B →

U →

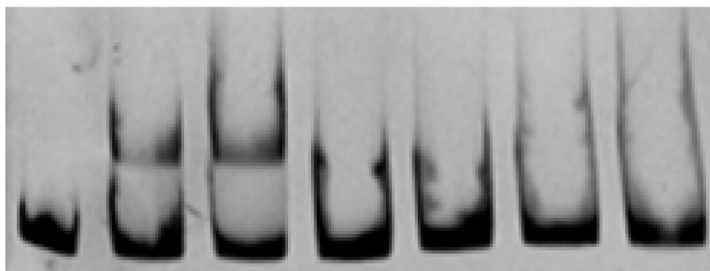**B**

|                                  |   |    |    |     |     |     |
|----------------------------------|---|----|----|-----|-----|-----|
| [2Fe-2S] <sup>2+</sup> RsrR (nM) | - | 60 | 80 | 100 | 120 | 140 |
| Ratio [Fe-S]:DNA                 | - | 17 | 23 | 29  | 34  | 40  |

NS →

B →

U →

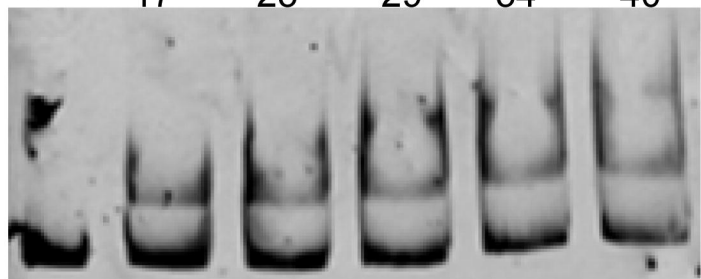**C**

|                                  |   |    |    |     |     |     |
|----------------------------------|---|----|----|-----|-----|-----|
| [2Fe-2S] <sup>1+</sup> RsrR (nM) | - | 60 | 80 | 100 | 120 | 140 |
| Ratio [Fe-S]:DNA                 | - | 17 | 23 | 29  | 34  | 40  |

B →

U →

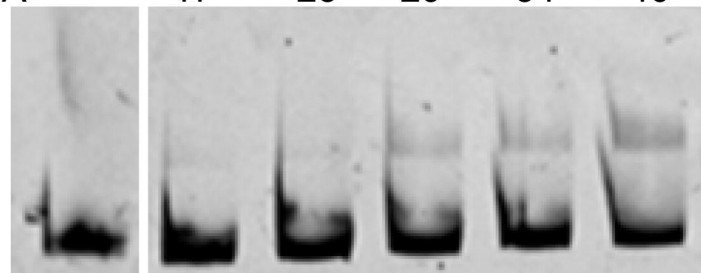

**A**

| Class 2 promoter                 | <i>sven0247</i> |     | <i>sven0519</i> |     |
|----------------------------------|-----------------|-----|-----------------|-----|
| [2Fe-2S] <sup>2+</sup> RsrR (nM) | -               | 321 | -               | 321 |
| Ratio [Fe-S]:DNA                 | -               | 16  | -               | 16  |

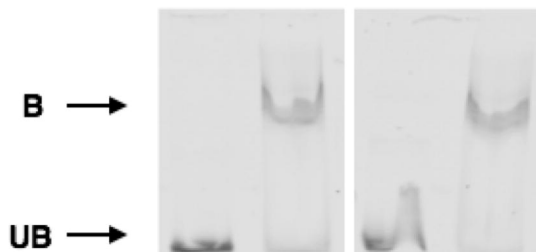

**B**

| Full site                        | 1 |     | 2 |     |
|----------------------------------|---|-----|---|-----|
| [2Fe-2S] <sup>2+</sup> RsrR (nM) | - | 321 | - | 321 |
| Ratio [Fe-S]:DNA                 | - | 16  | - | 16  |

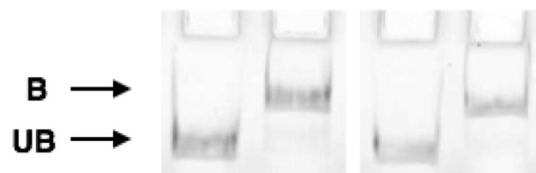

**C**

| Half site                        | 1 |     | 2 |     | 3 |     | 4 |     |
|----------------------------------|---|-----|---|-----|---|-----|---|-----|
| [2Fe-2S] <sup>2+</sup> RsrR (nM) | - | 321 | - | 321 | - | 321 | - | 321 |
| Ratio [Fe-S]:DNA                 | - | 16  | - | 16  | - | 16  | - | 16  |

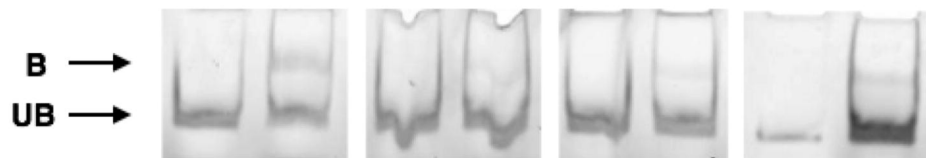

### *sven0372*

AACGAGGATGGGGCATGTCTGACATG

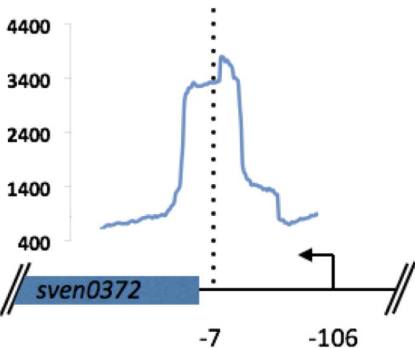

### *sven1561*

TCCACGAGGAGTTCCGACGGCGAGTTC

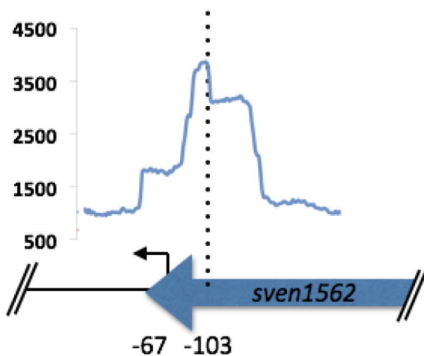

### *sven2494*

AATTCGGACATGTGAAGGTGCACTTC

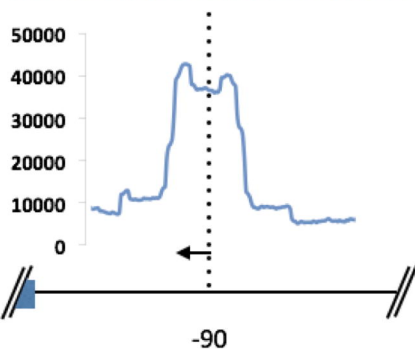

### *sven3827*

TACGCGGAGGAACCGTGTCCGGATTCC

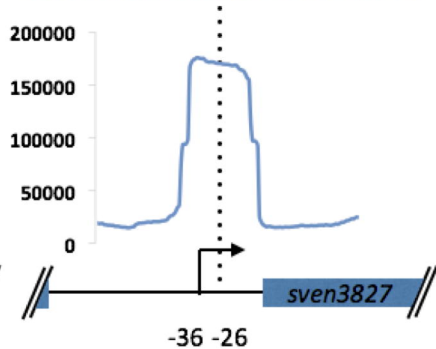

Source: http://www.biorxiv.org/content/10.1101/050989v1.full.pdf
